1 **Mitochondrial targeting of glycolysis in a major lineage of eukaryotes.**

2

3 Carolina Río Bártulos<sup>1,9</sup>, Matthew B. Rogers<sup>2§</sup>, Tom A. Williams<sup>3</sup>, Eleni Gentekaki<sup>4&</sup>, Henner  
4 Brinkmann<sup>5%</sup>, Rüdiger Cerff<sup>1</sup>, Marie-Françoise Liaud<sup>1</sup>, Adrian B. Hehl<sup>7</sup>, Nigel R. Yarlett<sup>8</sup>, Ansgar  
5 Gruber<sup>9</sup>, Peter G. Kroth<sup>9\*</sup>, Mark van der Giezen<sup>2\*</sup>

6

7 <sup>1</sup>*Institute of Genetics, University of Braunschweig, Spielmannstr. 7, D-38106 Braunschweig, Germany.*  
8 <sup>2</sup>*Biosciences, University of Exeter, Stocker Road, Exeter EX4 4QD, UK.* <sup>3</sup>*School of Biological Sciences,*  
9 *University of Bristol, BS8 1TH, United Kingdom.* <sup>4</sup>*Dalhousie University, Department of Biochemistry*  
10 *and Molecular Biology, Halifax, Canada, B3H 1X5.* <sup>5</sup>*Département de Biochimie, Université de*  
11 *Montréal C.P. 6128, Montréal, Quebec, Canada.* <sup>7</sup>*Institute of Parasitology, University of Zürich,*  
12 *Switzerland.* <sup>8</sup>*Department of Chemistry and Physical Sciences, Pace University, New York, NY 10038,*  
13 *USA.* <sup>9</sup>*Fachbereich Biologie, Universität Konstanz, 78457 Konstanz, Germany.* \*Corresponding  
14 authors.

15 <sup>§</sup>*Current address: Rangos Research Center, University of Pittsburgh, Children's Hospital, Pittsburgh,*  
16 *PA 15224, U.S.A.*

17 <sup>&</sup>*Current address: School of Science and Human Gut Microbiome for Health Research Unit, Mae Fah*  
18 *Luang University, Chiang Rai 57100, Thailand.*

19 <sup>%</sup>*Current address: Henner?*

20

21

22 **Glycolysis is a major cytosolic catabolic pathway that provides ATP for many organisms<sup>1</sup>.**  
23 **Mitochondria play an even more important role in the provision of additional cellular ATP for**  
24 **eukaryotes<sup>2</sup>. Here, we show that in many stramenopiles, the C3 part of glycolysis is localised in**  
25 **mitochondria. We discovered genuine mitochondrial targeting signals on the six last enzymes of**  
26 **glycolysis. These targeting signals are recognised and sufficient to import GFP into mitochondria of**  
27 **a heterologous host. Analysis of eukaryotic genomes identified these targeting signals on many**  
28 **glycolytic C3 enzymes in a large group of eukaryotes found in the SAR supergroup<sup>3</sup>, in particular**  
29 **the stramenopiles. Stramenopiles, or heterokonts, are a large group of ecologically important**  
30 **eukaryotes that includes multi- and unicellular algae such as kelp and diatoms, but also**  
31 **economically important oomycete pathogens such as *Phytophthora infestans*. Confocal**  
32 **immunomicroscopy confirmed the mitochondrial location of glycolytic enzymes for the human**  
33 **parasite *Blastocystis*. Enzyme assays on cellular fractions confirmed the presence of the C3 part of**  
34 **glycolysis in *Blastocystis* mitochondria. These activities are sensitive to treatment with proteases**

35 **and Triton X-100 but not proteases alone. Our work clearly shows that core cellular metabolism is**  
36 **more plastic than previously imagined and suggests new strategies to combat stramenopile**  
37 **pathogens such as the causative agent of late potato blight, *P. infestans*.**

38 Mitochondria provide the bulk of cellular ATP for eukaryotes by means of regenerating  
39 reduced NAD via the electron transport chain and oxidative phosphorylation<sup>2</sup>. In addition,  
40 mitochondria are essential for the production of iron-sulfur clusters<sup>4</sup>, and play roles in heme  
41 synthesis, fatty acid and amino acid metabolism<sup>5</sup>. Cytosolic pyruvate is decarboxylated by  
42 mitochondrial pyruvate dehydrogenase into acetyl-CoA which enters the citric acid cycle,  
43 subsequently producing one GTP (or ATP) and precursors for several anabolic pathways. More  
44 importantly, the reduction of NAD<sup>+</sup> to NADH and production of succinate power the electron  
45 transport pathway and oxidative phosphorylation, being responsible for the majority of cellular ATP  
46 synthesis. The pyruvate is produced by glycolysis, a widespread cytosolic pathway that converts the  
47 six-carbon sugar glucose via a series of ten reactions into the three-carbon sugar pyruvate. Glycolysis  
48 is nearly universally present in the cytosol of most eukaryotes but also found in specialised  
49 microbodies known as glycosomes originally described in trypanosomatids<sup>6</sup>. More recently, two  
50 glycolytic enzymes were also found to be targeted to peroxisomes in fungi due to post-  
51 transcriptional processes<sup>7</sup>.

52 When analysing the genome of the intestinal parasite *Blastocystis*<sup>8</sup>, we discovered putative  
53 mitochondrial targeting signals on phosphoglycerate kinase (PGK) and on a fusion protein of triose  
54 phosphate isomerase (TPI) and glyceraldehyde phosphate dehydrogenase (GAPDH). The amino-  
55 terminal sequences conform to typical mitochondrial targeting signals<sup>9</sup> and are easily predicted by  
56 programmes such as MitoProt<sup>10</sup>. Analysis of the *Blastocystis* TPI-GAPDH and PGK sequences predicts  
57 a mitochondrial localisation with high probabilities (P 0.99 and 0.97, respectively). The predicted  
58 cleavage sites coincide with the start of the cytosolic enzymes from other organisms (Supplementary  
59 Fig. S1A) suggesting that these amino-terminal sequences might target both proteins to the  
60 mitochondrial organelle in this parasite<sup>11</sup>. We confirmed the functionality and sufficiency of these  
61 putative targeting signals by targeting GFP fused to these signals to mitochondria of a heterologous  
62 stramenopile host (Supplementary Fig. S2). Homologous antibodies were raised against *Blastocystis*  
63 TPI-GAPDH and PGK to test whether these proteins show an organellar localisation.  
64 Compartmentalised distribution of both TPI-GAPDH and PGK was clearly demonstrated using  
65 confocal microscopy and 3-dimensional rendering of optical sections (Fig. 1 A-D). Both proteins co-  
66 localise with the mitochondrial marker dye MitoTracker and in addition with DAPI which labels the  
67 organellar genomic DNA<sup>11,12</sup> (Fig. 1 E-I).

68 The unexpected mitochondrial localisation of three glycolytic enzymes in *Blastocystis* prompted  
69 the analysis of all glycolytic enzymes in this intestinal parasite. Interestingly, targeting signals were  
70 only observed on the enzymes of the pay-off phase of glycolysis but not the investment phase (Fig.  
71 2). Although three-dimensional reconstruction of our confocal microscopy data strongly indicated  
72 that these enzymes are indeed localised inside *Blastocystis* mitochondria (Fig. 1), we decided to  
73 confirm these findings using classical enzyme assays following cellular fractionation. These assays  
74 clearly showed that five C3 enzymes are found in the mitochondrial pellet while the five upstream  
75 enzymes are all confined to the soluble fraction (Table 1). To assess whether the putative  
76 mitochondrial enzymes were only laterally attached to the organelles, as in the case of hexokinase to  
77 VDAC in tumours<sup>1</sup>, we tested the latency of enzymatic activities in the presence or absence of Triton  
78 X-100. The increase of measurable activity of the C3 enzymes (not shown) suggests they are retained  
79 within a membranous compartment. The addition of proteolytic enzymes only affected the  
80 measured activity in the presence of the detergent Triton X-100 (Supplementary Table S1), clearly  
81 demonstrating that the five C3 glycolytic enzymes in *Blastocystis* are protected by a membrane and  
82 reside inside the mitochondria and not on the outside of the organelle, as observed in certain  
83 tumours<sup>1</sup> or as in some proteomics studies<sup>13,14</sup>.

84 As some of us previously reported the mitochondrial localisation of the TPI-GAPDH fusion  
85 protein in a related stramenopile<sup>15</sup>, we wondered whether mitochondrial targeting of glycolytic  
86 enzymes is more widespread in this group of organisms. When querying all available stramenopile  
87 genomes, we noticed the widespread presence of mitochondrial targeting signals on glycolytic  
88 enzymes within the whole group. Here, as with *Blastocystis*, only enzymes of the C3 part of glycolysis  
89 seem to contain mitochondrial targeting signals (Fig. 2 and supplementary Fig. S1B). To test for  
90 functionality, all mitochondrial targeting signals from *Phaeodactylum* C3 glycolytic enzymes were  
91 fused to GFP and their cellular location was determined (Supplementary Fig. S2). As with  
92 *Blastocystis*, all constructs were targeted to the mitochondrion suggesting these are genuine  
93 mitochondrial targeting signals *in vivo*. In addition, we tested mitochondrial targeting signals found  
94 on glycolytic enzymes of the oomycete pathogen *Phytophthora infestans*, the water mould *Achlya*  
95 *bisexualis* and the multicellular brown alga *Saccharina latissima*, commonly known as kelp  
96 (Supplementary Fig. S2). In all cases, these targeting signals targeted GFP into mitochondria.  
97 However, some organisms also contain non-targeting signal bearing glycolytic enzymes suggesting  
98 that these cells likely have a branched glycolysis (see Supplementary Fig. S4 for *P. tricornutum*).

99 Previously, some bioinformatics studies<sup>16,17</sup> had hinted at the possible mitochondrial location of  
100 several glycolytic enzymes. Here, using molecular, biochemical and cell biological methods, we

101 clearly demonstrate the mitochondrial location of glycolytic enzymes of the pay-off phase of  
102 glycolysis in a major group of eukaryotes comprising both microbial and multicellular forms. The  
103 mitochondrial proteome has a complex and contested evolutionary past<sup>18,19</sup>, and we wondered if  
104 glycolytic enzymes targeted to mitochondria might have different evolutionary origins than those  
105 that operate in the cytosol. Phylogenetic analysis of all glycolytic enzymes provided no support for  
106 this hypothesis because stramenopile glycolytic enzymes cluster with the cytosolic forms of other  
107 eukaryotes in phylogenetic trees (Supplementary Figure S3 A-F). This result suggests that the  
108 canonical, cytosolic enzymes of glycolysis were targeted to the mitochondrion during stramenopile  
109 evolution.

110 It is difficult to conclusively determine the selective rationale, if any, for the retargeting of  
111 glycolysis to stramenopile mitochondria. In *Blastocystis*, and similar to many parasitic eukaryotes<sup>20</sup>,  
112 two key glycolytic enzymes have been replaced by pyrophosphate using versions. Normally, the  
113 reactions catalysed by phosphofructokinase and pyruvate kinase are virtually irreversible. However,  
114 the reactions performed by diphosphate-fructose-6-phosphate 1-phosphotransferase and  
115 phosphoenolpyruvate synthase (pyruvate, water dikinase) are reversible, due to the smaller free-  
116 energy change in the reaction. As *Blastocystis* is an anaerobe and does not contain normal  
117 mitochondrial oxidative phosphorylation<sup>11</sup>, any ATP not invested during glycolysis might be a  
118 selective advantage. However, in the absence of these irreversible control points there is a risk of  
119 uncontrolled glycolytic oscillations<sup>21</sup>. Separating the investment phase from the pay-off phase by the  
120 mitochondrial membrane might therefore prevent futile cycling. However, as not all stramenopiles  
121 use pyrophosphate enzymes, this cannot be the whole explanation.

122 The end-product of glycolysis, pyruvate, is transported into mitochondria via a specific  
123 mitochondrial transporter that has only recently been identified<sup>22</sup> and that is absent from the  
124 *Blastocystis* genome<sup>8</sup>. The translocation of the C3 part of glycolysis into mitochondria would  
125 necessitate a novel transporter (presumably for triose phosphates). The identification and  
126 characterisation of such a transporter would open up new possible drug targets against important  
127 pathogens. Examples include *Phytophthora infestans*, the causative agent of late potato blight,  
128 which has a devastating effect on food security, but also fish parasites such as *Saprolegnia parasitica*  
129 and *Aphanomyces invadans*. Both have serious consequences for aquaculture and the latter causes  
130 epizootic ulcerative syndrome, an OIE listed disease<sup>23,24</sup>. Our recent genome analysis of *Blastocystis*  
131 identified several putative candidate transporters lacking clear homology to non-stramenopile  
132 organisms<sup>8</sup>. Such a unique transporter would not be present in the host (including humans) and

133 could be exploited to prevent, or control, disease outbreaks that currently affect food production  
134 while the world population continuous to increase<sup>25</sup>.

135

136 Acknowledgements. The authors wish to thank Professors John F. Allen and Nick Lane (both UCL,  
137 UK) for fruitful discussions and criticism. Furthermore, we want to thank Ulrike Brand (TU-BS) and  
138 Doris Ballert (Uni KN) for technical assistance. TAW is supported by a Royal Society University  
139 Research Fellowship. Work in the lab of MvdG was supported by Wellcome Trust grant  
140 078566/A/05/Z. PGK wishes to acknowledge support by the German Research Foundation (DFG,  
141 grant KR 1661/6-1), the Gordon and Betty Moore Foundation GBMF 4966 (grant DiaEdit), and the  
142 Biolmaging Center of the University of Konstanz as well as Professor Mendel and his group (TU-BS)  
143 for using their equipment.

144

- 145 1 Lunt, S. Y. & Vander Heiden, M. G. Aerobic glycolysis: meeting the metabolic requirements of  
146 cell proliferation. *Annu Rev Cell Dev Biol* **27**, 441-464, doi:10.1146/annurev-cellbio-092910-  
147 154237 (2011).
- 148 2 Müller, M. *et al.* Biochemistry and evolution of anaerobic energy metabolism in eukaryotes.  
149 *Microbiol Mol Biol Rev* **76**, 444-495 (2012).
- 150 3 Adl, S. M. *et al.* The revised classification of eukaryotes. *J Eukaryot Microbiol* **59**, 429-493,  
151 doi:10.1111/j.1550-7408.2012.00644.x (2012).
- 152 4 Lill, R. *et al.* The essential role of mitochondria in the biogenesis of cellular iron-sulfur  
153 proteins. *Biol. Chem.* **380**, 1157-1166 (1999).
- 154 5 Scheffler, I. E. *Mitochondria. 2nd edition.* 2nd edn, (J. Wiley and Sons, Inc., 2008).
- 155 6 Opperdoes, F. R. & Borst, P. Localization of nine glycolytic enzymes in a microbody-like  
156 organelle in *Trypanosoma brucei*: the glycosome. *FEBS Lett* **80**, 360-364 (1980).
- 157 7 Freitag, J., Ast, J. & Bolker, M. Cryptic peroxisomal targeting via alternative splicing and stop  
158 codon read-through in fungi. *Nature* **485**, 522-525 (2012).
- 159 8 Gentekaki, E. *et al.* Extreme genome diversity in the hyper-prevalent parasitic eukaryote  
160 *Blastocystis*. *PLoS Biol* **15**, e2003769 (2017).
- 161 9 Neupert, W. & Herrmann, J. M. Translocation of proteins into mitochondria. *Annu Rev*  
162 *Biochem* **76**, 723-749 (2007).
- 163 10 Claros, M. G. & Vincens, P. Computational method to predict mitochondrially imported  
164 proteins and their targeting sequences. *Eur. J. Biochem.* **241**, 779-786 (1996).
- 165 11 Stechmann, A. *et al.* Organelles in *Blastocystis* that blur the distinction between  
166 mitochondria and hydrogenosomes. *Curr Biol* **18**, 580-585 (2008).
- 167 12 Pérez-Brocal, V. & Clark, C. G. Analysis of two genomes from the mitochondrion-like  
168 organelle of the intestinal parasite *Blastocystis*: complete sequences, gene content and  
169 genome organization. *Mol. Biol. Evol.* **25**, 2475-2482 (2008).
- 170 13 Smith, D. G. *et al.* Exploring the mitochondrial proteome of the ciliate protozoan  
171 *Tetrahymena thermophila*: direct analysis by tandem mass spectrometry. *J Mol Biol* **374**,  
172 837-863 (2007).
- 173 14 Giege, P. *et al.* Enzymes of glycolysis are functionally associated with the mitochondrion in  
174 *Arabidopsis* cells. *Plant Cell* **15**, 2140-2151 (2003).

- 175 15 Liaud, M. F., Lichtle, C., Apt, K., Martin, W. & Cerff, R. Compartment-specific isoforms of TPI  
176 and GAPDH are imported into diatom mitochondria as a fusion protein: evidence in favor of  
177 a mitochondrial origin of the eukaryotic glycolytic pathway. *Mol Biol Evol* **17**, 213-223 (2000).
- 178 16 Kroth, P. G. *et al.* A model for carbohydrate metabolism in the diatom *Phaeodactylum*  
179 *tricornutum* deduced from comparative whole genome analysis. *PLoS ONE* **3**, e1426,  
180 doi:10.1371/journal.pone.0001426 (2008).
- 181 17 Nakayama, T., Ishida, K. & Archibald, J. M. Broad distribution of TPI-GAPDH fusion proteins  
182 among eukaryotes: evidence for glycolytic reactions in the mitochondrion? *PLoS ONE* **7**,  
183 e52340 (2012).
- 184 18 Pittis, A. A. & Gabaldon, T. Late acquisition of mitochondria by a host with chimaeric  
185 prokaryotic ancestry. *Nature* **531**, 101-104, doi:10.1038/nature16941 (2016).
- 186 19 Ku, C. *et al.* Endosymbiotic origin and differential loss of eukaryotic genes. *Nature* **524**, 427-  
187 432, doi:10.1038/nature14963 (2015).
- 188 20 Mertens, E. ATP versus pyrophosphate: glycolysis revisited in parasitic protists. *Parasitol*  
189 *Today* **9**, 122-126 (1993).
- 190 21 Chandra, F. A., Buzi, G. & Doyle, J. C. Glycolytic oscillations and limits on robust efficiency.  
191 *Science* **333**, 187-192, doi:10.1126/science.1200705 (2011).
- 192 22 Herzig, S. *et al.* Identification and functional expression of the mitochondrial pyruvate  
193 carrier. *Science* **337**, 93-96 (2012).
- 194 23 Jiang, R. H. & Tyler, B. M. Mechanisms and evolution of virulence in oomycetes. *Annu Rev*  
195 *Phytopathol* **50**, 295-318, doi:10.1146/annurev-phyto-081211-172912 (2012).
- 196 24 Stentiford, G. D., Feist, S. W., Stone, D. M., Peeler, E. J. & Bass, D. Policy, phylogeny, and the  
197 parasite. *Trends Parasitol* **30**, 274-281, doi:10.1016/j.pt.2014.04.004 (2014).
- 198 25 FAO. How to feed the world in 2050. (Food and Agriculture Organization of the United  
199 Nations (FAO), 2009).

200

201

202 **Tables and Figures**

203

204

205 **Table 1.** Pay-off phase glycolytic enzymes in *Blastocystis* are found in the pellet. Activities of  
206 glycolytic enzymes from whole cell free extracts (c.f.e.) of *Blastocystis* suspended in phosphate  
207 buffered isotonic sucrose solution (pH 7.2). Cells were mixed at a ratio of two volumes of cells: three  
208 volumes of 0.5 mm glass beads and broken by three shakes of one minute each at maximum speed  
209 on a bead beater (VWR mini bead mill homogenizer (Atlanta, GA, USA)). Cell-free extracts were  
210 subjected to increasing centrifugal force producing nuclear, mitochondrial (pellet), lysosomal and  
211 cytosolic (supernatant) fractions at 1,912 RCF<sub>av</sub> for 5 min, 6,723 RCF<sub>av</sub> for 15 min, 26,892 RCF<sub>av</sub> for 30  
212 min, respectively. Enzyme activities are the average of three determinations  $\pm$  SD. \*1 enzyme unit  
213 (EU) is the amount of enzyme that converts 1  $\mu$ mole substrate to product per minute. The yellow  
214 box indicates the site of major activity (or in the case of triosephosphate isomerase, the dual  
215 localization).

216

217 **Figure 1.** The glycolytic enzymes TPI-GAPDH and PGK localize to mitochondria in the human parasite  
218 *Blastocystis*. Three-dimensional immunoconfocal microscopy reconstruction of optical sections  
219 (volume rendering) showing representative subcellular localization of PGK (blue) and TPI (red) in  
220 trophozoites (A-D). PGK (A) and TPI (B) volume signals show distinct distributions, consistent with  
221 localization within mitochondria, with considerable overlap. The merged image (C) provides a  
222 qualitative and the scatterplot (inset) of a quantitative measure of signal overlap. Co-localisation of  
223 MitoTracker (red) and PGK (green) and DAPI (blue) in trophozoites (E-I). Merged images  
224 MitoTracker/DAPI (E) PGK/DAPI (F) and TPI (G) and all three markers together (H) show considerable  
225 overlap. Scatterplots (inset) give a quantitative measure of signal overlap for each merged pair of  
226 markers (E-G). The DAPI signals (blue) representing nuclear DNA are indicated by asterisks (E). Scale  
227 bar 3  $\mu$ m (A-D) or 2  $\mu$ m (E-I).

228

229 **Figure 2.** Stramenopile glycolytic enzymes contain mitochondrial-like amino-terminal targeting  
230 sequences. Representative stramenopiles with whole genome data known are shown. Presence of  
231 mitochondrial-like targeting signal is shown with a filled circle while open circle indicates no  
232 mitochondrial-like targeting signal. Where multiple isoforms with and without targeting signal exist,  
233 a half-filled circle is shown.

|                                               | c.f.e.     | supernatant | pellet     |
|-----------------------------------------------|------------|-------------|------------|
| hexokinase                                    | 9.3 ± 2.6  | 21.1 ± 3.6  | 2.3 ± 0.6  |
| phosphoglucose isomerase                      | 3.6 ± 0.8  | 5.8 ± 1.2   | 1.7 ± 0.4  |
| (pyrophosphate-dependent) phosphofructokinase | 11.2 ± 1.8 | 27.1 ± 3.2  | 2.4 ± 1.6  |
| fructose bisphosphate aldolase                | 3.8 ± 1.3  | 10.9 ± 1.3  | 0.62 ± 0.3 |
| triosephosphate isomerase                     | 18.3 ± 3.1 | 36 ± 5.1    | 18.0 ± 2.8 |
| glyceraldehyde phosphate dehydrogenase        | 9.2 ± 1.4  | 0.5 ± 0.1   | 54.7 ± 5.8 |
| phosphoglycerate kinase                       | 9.8 ± 1.7  | 5.3 ± 1.3   | 36.2 ± 4.1 |
| phosphoglycerate mutase                       | 1.2 ± 0.5  | 0.04 ± 0.01 | 2.6 ± 0.7  |
| enolase                                       | 0.42 ± 0.1 | 0.37 ± 0.07 | 1.6 ± 0.4  |
| pyruvate kinase/phosphoenolpyruvate synthase  | 2.8 ± 0.7  | 3.3 ± 0.10  | 15.4 ± 2.3 |

Table 1



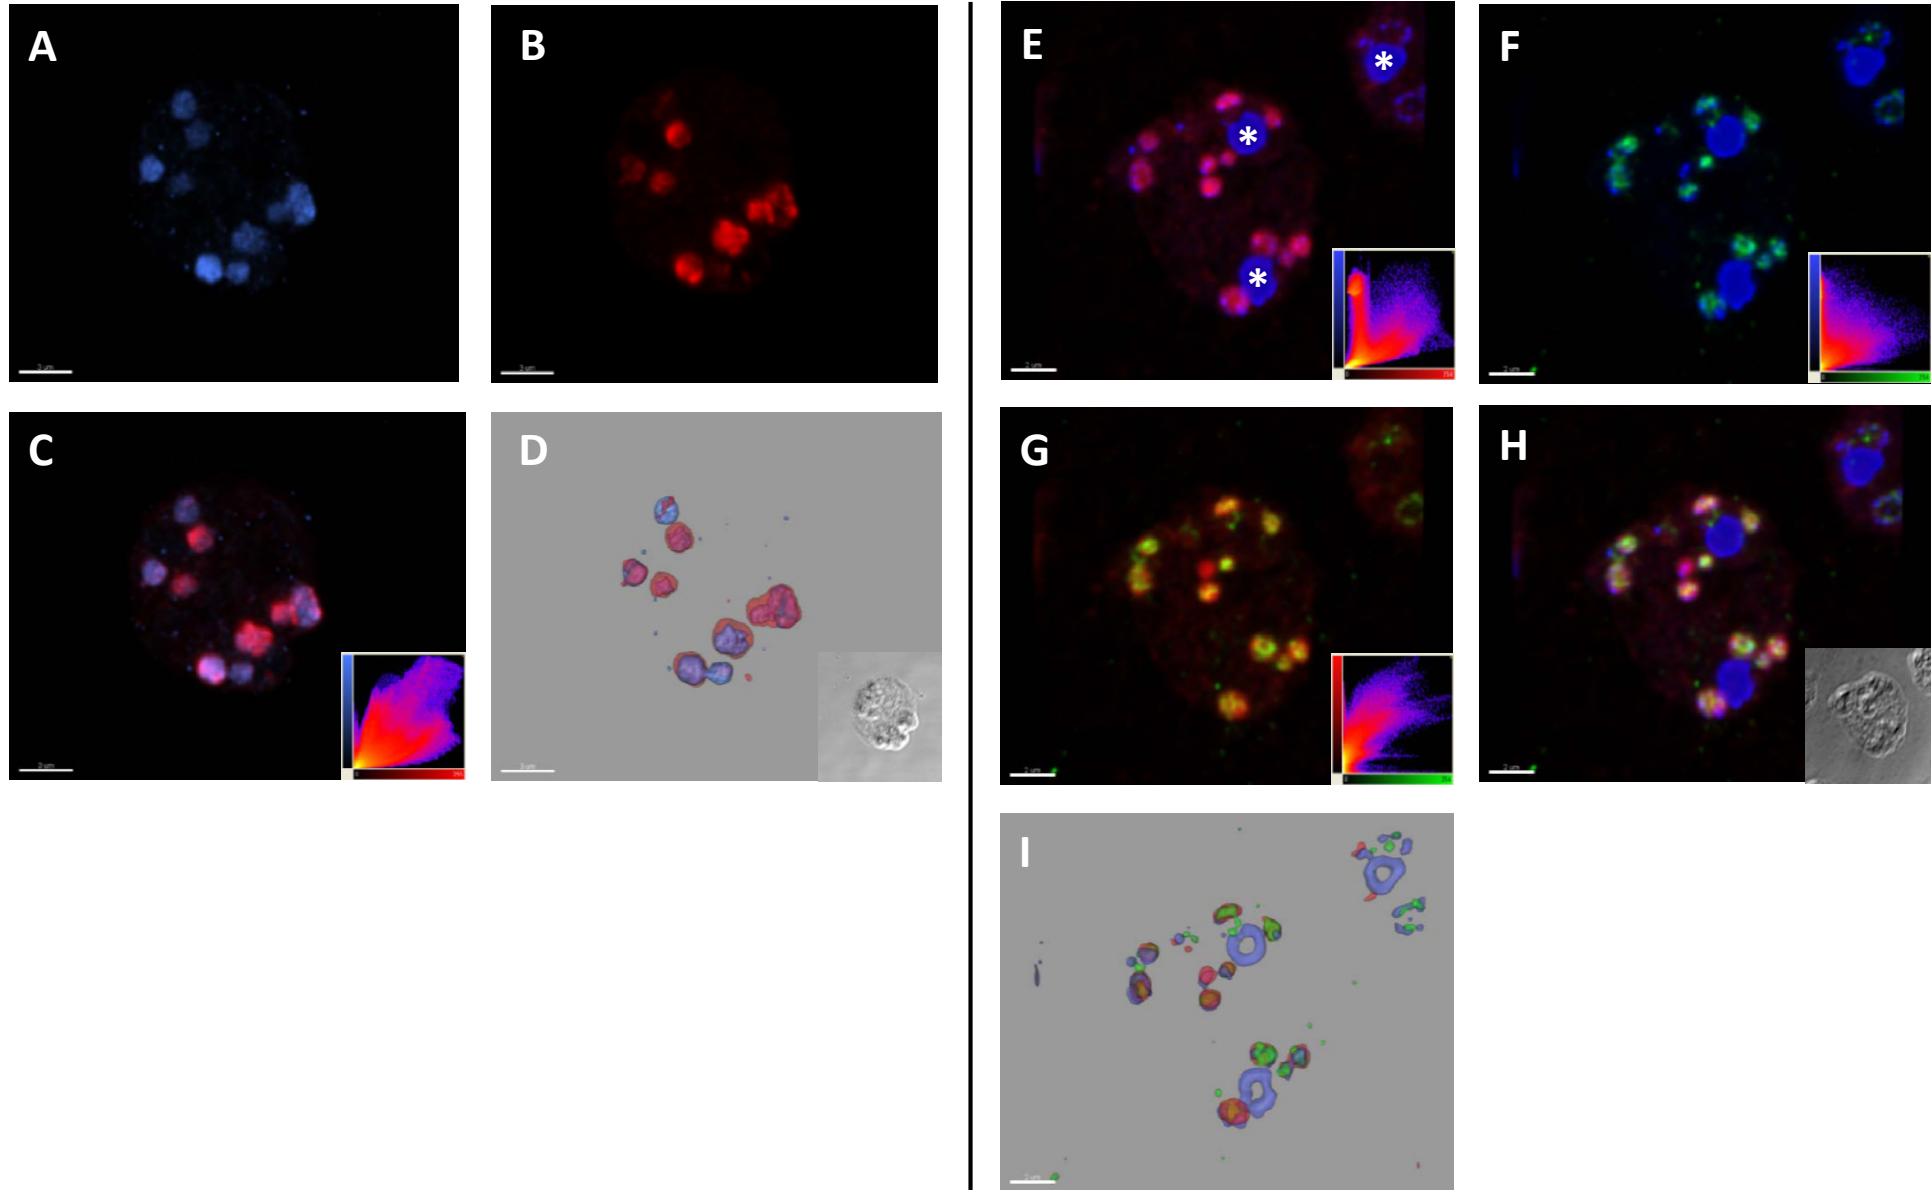

Figure 1

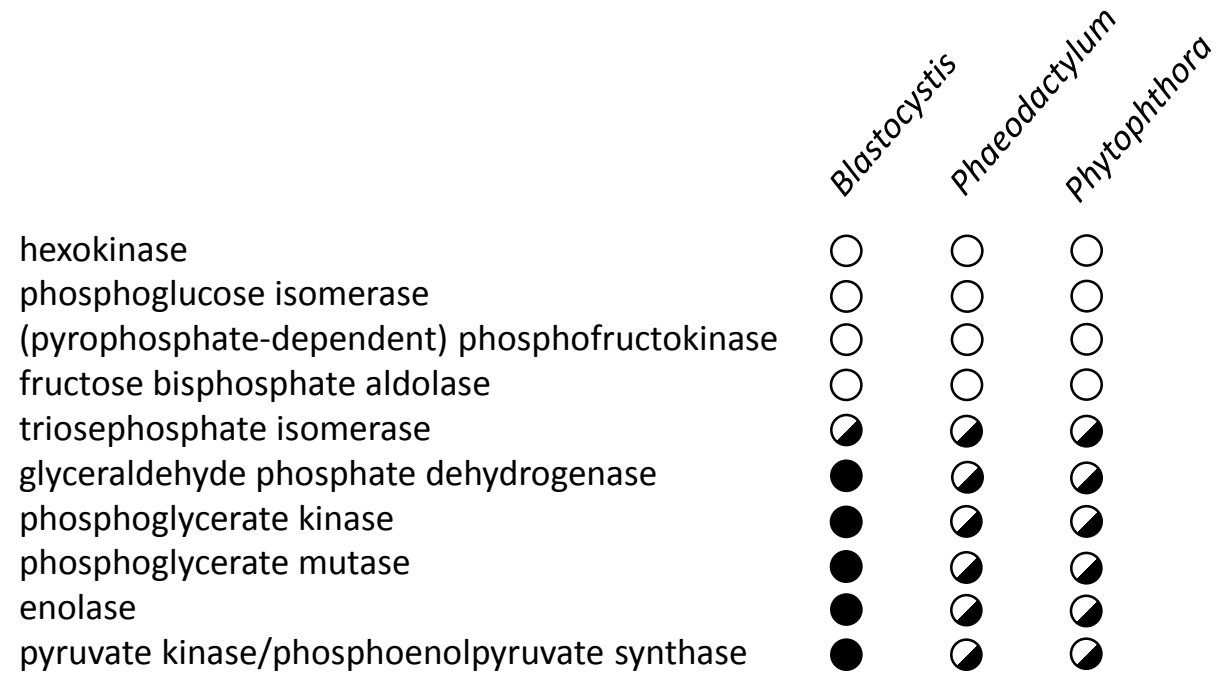

Figure 2

1 **Supplementary Tables and Figures**

2

3

4 **Supplementary Table 1.** *Blastocystis* glycolytic enzymes are protected by a membrane. Control:  
5 Mitochondrial fractions incubated without proteolytic enzymes. Protease: Mitochondria incubated  
6 in 225 mM sucrose buffer at 25 °C containing 500 U bovine pancreas trypsin, 10 U papaya latex  
7 papain and 250 U porcine pepsin for 15 minutes. Protease + Triton: Mitochondrial fractions  
8 containing proteolytic enzymes and 1% Triton X-100 incubated for 15 min at 25 °C. Samples were  
9 centrifuged (14,000 g) for 2 min and resuspended in fresh sucrose buffer without proteolytic  
10 enzymes prior to assay.

11

12 **Figure S1.** Stramenopile glycolytic C3 enzymes contain amino-terminal targeting signals. A.  
13 Comparison of *Blastocystis* amino-terminal sequences for TPI-GAPDH, PGK, PMG, and enolase with  
14 homologs from yeast showing the mitochondrial-like targeting signals. B. *Phaeodactylum*  
15 *tricornutum* glycolytic C3 enzyme amino-termini of TPI-GAPDH, PGK, PMG, enolase, and pyruvate  
16 kinase compared to yeast homologs demonstrate mitochondrial-like targeting signals.

17

18 **Figure S2.** Stramenopile glycolytic enzyme amino-terminal mitochondrial-like targeting signals are  
19 sufficient to target GFP to mitochondria in the diatom *Phaeodactylum tricornutum*. A. The  
20 *Blastocystis* glycolytic enzymes TPI-GAPDH and PGK contain amino-terminal targeting signals that  
21 can target GFP to *P. tricornutum* mitochondria. B. Amino-terminal extensions on TPI-GAPDH, PGK,  
22 phosphoglycerate mutase (PGM), enolase and pyruvate kinase (PK) from the diatom *P. tricornutum*  
23 were cloned in front of GFP and constructs used to transform *P. tricornutum*. C. Amino terminal  
24 extensions on TPI-GAPDH and PGM from *Phytophthora infestans*, PK from *Achlya bisexualis* and TPI-  
25 GAPDH from *Saccharina latissima* were used as above to test for functionality of targeting  
26 information in *P. tricornutum*. DIC, Differential interference contrast microscopy. Chl, Chlorophyll *a*  
27 autofluorescence. GFP, Green fluorescent protein. Chl+GFP, Merged imaged showing the discrete  
28 (mitochondrial) localization of GFP. MitoTraker, MitoTraker Orange stain. MitoTraker+GFP, Merged  
29 image show considerable overlap of MitoTraker stain and GFP fluorescence. For the corresponding  
30 amino acid sequences used for GFP targeting, see Supplementary File 1. Scale bar 5  $\mu$ m.

31

32 **Figure S3.** Phylogenetic analysis of glycolytic enzymes of the pay-off phase. A. Triosephosphate  
33 isomerase (TPI), 77 sequences and 167 amino acid positions were used to calculate the tree.  
34 Bacterial sequences were used as outgroup. B. Glyceraldehyde-3-phosphate dehydrogenase

35 (GAPDH), only GAPDH from the C-type are illustrated in the tree. 96 sequences and 266 amino acid  
36 positions were used to calculate the tree. One branch caused long branch attraction (LBA) artifact  
37 and therefore is shortened in the figure. C. Phosphoglycerate kinase (PGK), 66 sequences and 360  
38 amino acid positions were used to calculate the tree. D. Phosphoglycerate mutase (PGM), 96  
39 sequences and 199 amino acid positions were used to calculate the tree. E. Enolase (ENO), 80  
40 sequences and 345 amino acid positions were used to calculate the tree. F. Pyruvate kinase (PK), 80  
41 sequences and 287 amino acid positions were used to calculate the tree. Values at nodes: posterior  
42 probabilities (P.P. >0.5) / rapid bootstrap values (BS>30%). Species name in bold = localization  
43 experimental proof (arrow = in this study, star Liaud *et. al* (2000)). TargetP analysis: M = mTP =  
44 mitochondria (bold indicates scores > 0.700), O = other, SP = signal peptide, C = cTP = chloroplast  
45 only for Viridiplantae, Rhodophyta and Glaucocystophyceae plant results was taken if non-plant  
46 results differ. N.D.: sequences not analyzed; not complete at N-terminus or start methionine is  
47 missing (proof by an alignment). Colour code: **Viridiplantae**, **Stramenopiles**, **Alveolata**, **Rhizaria**,  
48 **Rhodophyta**, **Cryptophyta**, **Haptophyceae**, **Bacteria**, other Eukaryota, **Archaea**, **Cyanobacteria**,  
49 **Euglenozoa**.

50

51 **Figure S4.** *Phaeodactylum tricornutum* contains, similar to some other stramenopiles, multiple  
52 isoforms for the C3 part of glycolysis. The localization for all isoforms was tested via GFP-fusion  
53 constructs. A “pre” suffix means that the predicted targeting signal was used; if the suffix is missing  
54 the full length of the respective sequence was fused to GFP. The number is the JGI Protein ID and the  
55 result of each localization is mentioned. For the corresponding amino acid sequences used for GFP  
56 targeting see Supplementary File 2. A star (\*) marks images were a maximum intensity projection  
57 from a Z-Stack was used. Unclear indicates localization not possible to identify. TPI =  
58 Triosephosphate isomerase, GAPDH = Glyceraldehyde-3-phosphate dehydrogenase, PGK =  
59 Phosphoglycerate kinase, PGM = Phosphoglycerate mutase, ENO = Enolase, PK = Pyruvate kinase.  
60 DIC, Differential interference contrast microscopy. Chl, Chlorophyll *a* autofluorescence. GFP, Green  
61 fluorescent protein. Chl+GFP, Merged imaged showing the discrete localization of GFP compared to  
62 Chlorophyll autofluorescence. For the corresponding amino acid sequences used for GFP targeting,  
63 see Supplementary File 2. Scale bar 5  $\mu$ m.

64

65

|                                        | control   | protease  | protease + Triton |
|----------------------------------------|-----------|-----------|-------------------|
| glyceraldehyde phosphate dehydrogenase | 71 ± 14   | 61 ± 9.1  | 15 ± 4.8          |
| phosphoglycerate kinase                | 36 ± 8.5  | 33 ± 4.5  | 6.3 ± 2.2         |
| phosphoglycerate mutase                | 4.0 ± 1.2 | 3.1 ± 0.5 | 0.2 ± 0.1         |
| enolase                                | 1.8 ± 0.9 | 1.4 ± 1.0 | 0.3 ± 0.1         |
| phosphoenolpyruvate synthase           | 28 ± 5.1  | 25 ± 4.9  | 7.6 ± 2.0         |

(1 μmol substrate to product per minute)

A

```

          10      20      30      40      50
Blasto TPI/GAPDH  MLR...S...V...I...A...R...S...F...G...S...A...A...R...K...L...F...V...G...G...N...W...K...C...N...G...S...L...S...K...V...Q...E...I...V...A...T...L...N...N...S...N...L...N...N...D...
Yeast TPI         -----M...A...R...T...F...F...V...G...G...N...F...K...L...N...G...S...K...Q...S...I...K...E...I...V...E...R...L...N...T...A...S...I...P...E...N...

          10      20      30      40      50
Blasto PGK       M...L...S...A...F...S...K...R...L...F...S...T...G...R...T...V...N...K...L...G...V...A...A...Y...A...K...S...H...S...M...A...G...K...T...V...F...V...R...V...D...F...N...V...P...L...S...K...D...G...I...
Yeast PGK        -----M...S...L...S...K...L...S...V...Q...D...L...D...L...K...D...K...R...V...F...I...R...V...D...F...N...V...P...L...--D...G...I...

          10      20      30      40      50
Blasto PGM       M...N...S...L...S...V...L...A...R...G...M...A...T...A...A...K...P...F...N...R...L...V...L...V...R...H...G...E...S...Q...W...N...K...E...N...R...F...T...G...W...Y...D...V...P...L...S...D...K...
Yeast PGM        -----M...P...K...L...V...L...V...R...H...G...Q...S...E...W...N...E...K...N...L...F...T...G...W...V...D...V...K...L...S...A...K...

          10      20      30      40      50
Blasto enolase   M...L...S...R...L...S...T...T...S...F...K...A...L...T...R...A...A...S...T...I...T...A...V...N...A...R...T...V...L...D...S...R...G...N...P...T...V...E...V...D...V...T...T...Q...D...G...T...F...R...
Yeast enolase    -----M...A...V...S...K...V...Y...A...R...S...V...Y...D...S...R...G...N...P...T...V...E...V...E...L...T...T...E...K...G...V...F...R...

```

B

```

          10      20      30      40      50
Phaeo TPI/GAPDH  M...L...A...S...S...R...T...A...A...A...S...V...Q...R...M...S...S...R...A...F...H...A...S...S...L...T...E...A...R...K...F...F...V...G...G...N...W...K...C...N...G...S...V...Q...Q...A...A...D...L...V...
Yeast TPI         -----M...A...R...T...F...F...V...G...G...N...F...K...L...N...G...S...K...Q...S...I...K...E...I...V...

          10      20      30      40      50      60      70
Phaeo PGK        M...F...R...M...L...T...S...T...A...L...R...R...S...P...V...T...S...S...L...T...S...C...C...K...A...N...A...F...A...V...R...I...R...S...F...H...A...A...P...V...I...Q...A...K...M...T...V...E...Q...L...A...Q...Q...V...D...M...K...G...T...N...V...L...V...R...V...D...L...N...A...P...L...A...T...D...D...
Yeast PGK        -----M...S...L...S...K...L...S...V...Q...D...L...D...L...K...D...K...R...V...F...I...R...V...D...F...N...V...P...L...--D...G...I...

          10      20      30      40      50
Phaeo PGM       M...F...A...V...S...R...S...F...L...L...A...T...R...V...K...T...L...R...S...F...A...A...V...Q...A...A...D...K...H...T...L...V...L...V...R...H...G...E...S...T...W...N...L...E...N...K...F...T...G...W...Y...D...C...P...L...S...P...K...
Yeast PGM        -----M...P...K...L...V...L...V...R...H...G...Q...S...E...W...N...E...K...N...L...F...T...G...W...V...D...V...K...L...S...A...K...

          10      20      30      40      50
Phaeo enolase   M...M...W...S...R...P...V...L...R...R...N...I...S...T...T...R...A...S...S...S...R...R...F...L...S...A...I...T...G...V...H...G...R...E...I...I...D...S...R...G...N...P...T...V...E...V...D...V...T...T...A...Q...G...T...F...T...
Yeast enolase    -----M...A...V...S...K...V...Y...A...R...S...V...Y...D...S...R...G...N...P...T...V...E...V...E...L...T...T...E...K...G...V...F...R...

          10      20      30      40      50      60      70
Phaeo pyruvate kinase  M...M...R...S...F...L...R...H...A...H...R...R...A...C...A...Q...Q...L...R...T...I...G...T...L...R...L...N...Q...M...P...V...T...G...A...N...T...K...I...V...C...T...I...G...P...A...S...D...Q...A...E...S...L...G...Q...L...V...T...Y...G...M...S...V...A...R...L...N...F...S...H...
Yeast pyruvate kinase -----M...P...E...S...R...L...Q...R...L...A...N...L...K...I...G...-T...P...Q...Q...L...R...R...T...S...I...I...G...T...I...G...P...K...T...N...S...C...E...A...I...T...A...L...R...K...A...G...L...N...I...I...R...L...N...F...S...H...

```



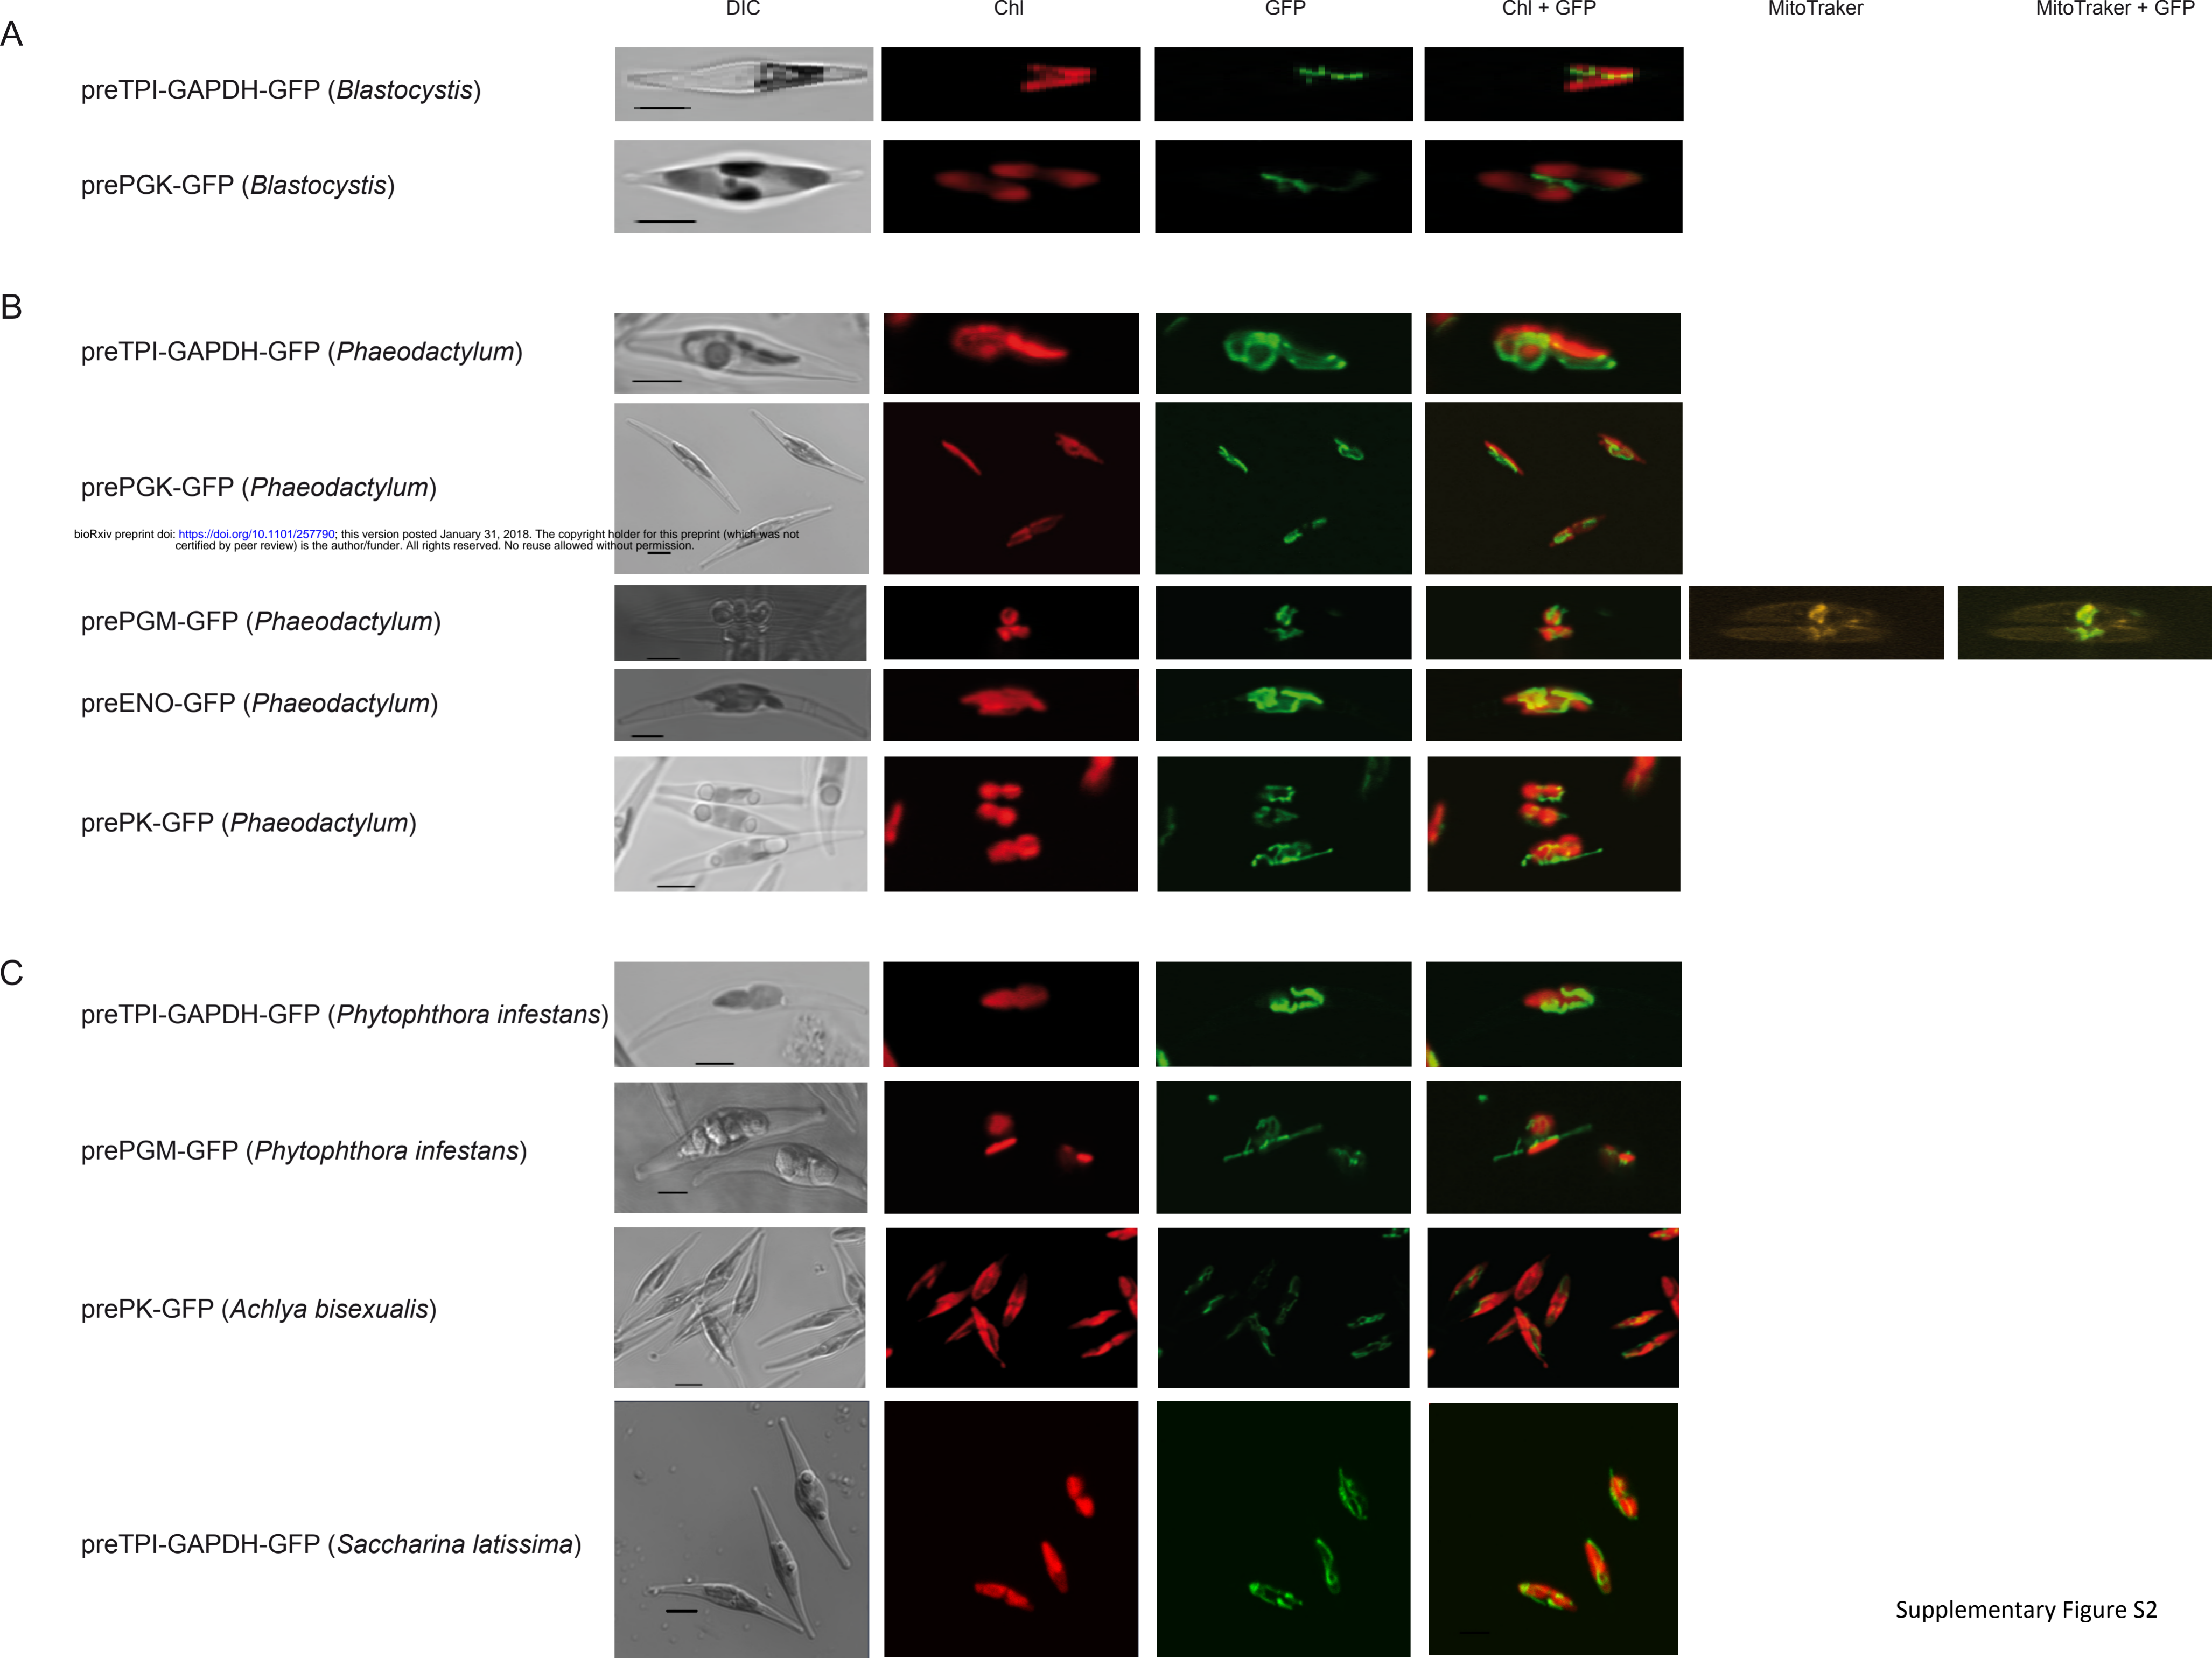

# A. TPI

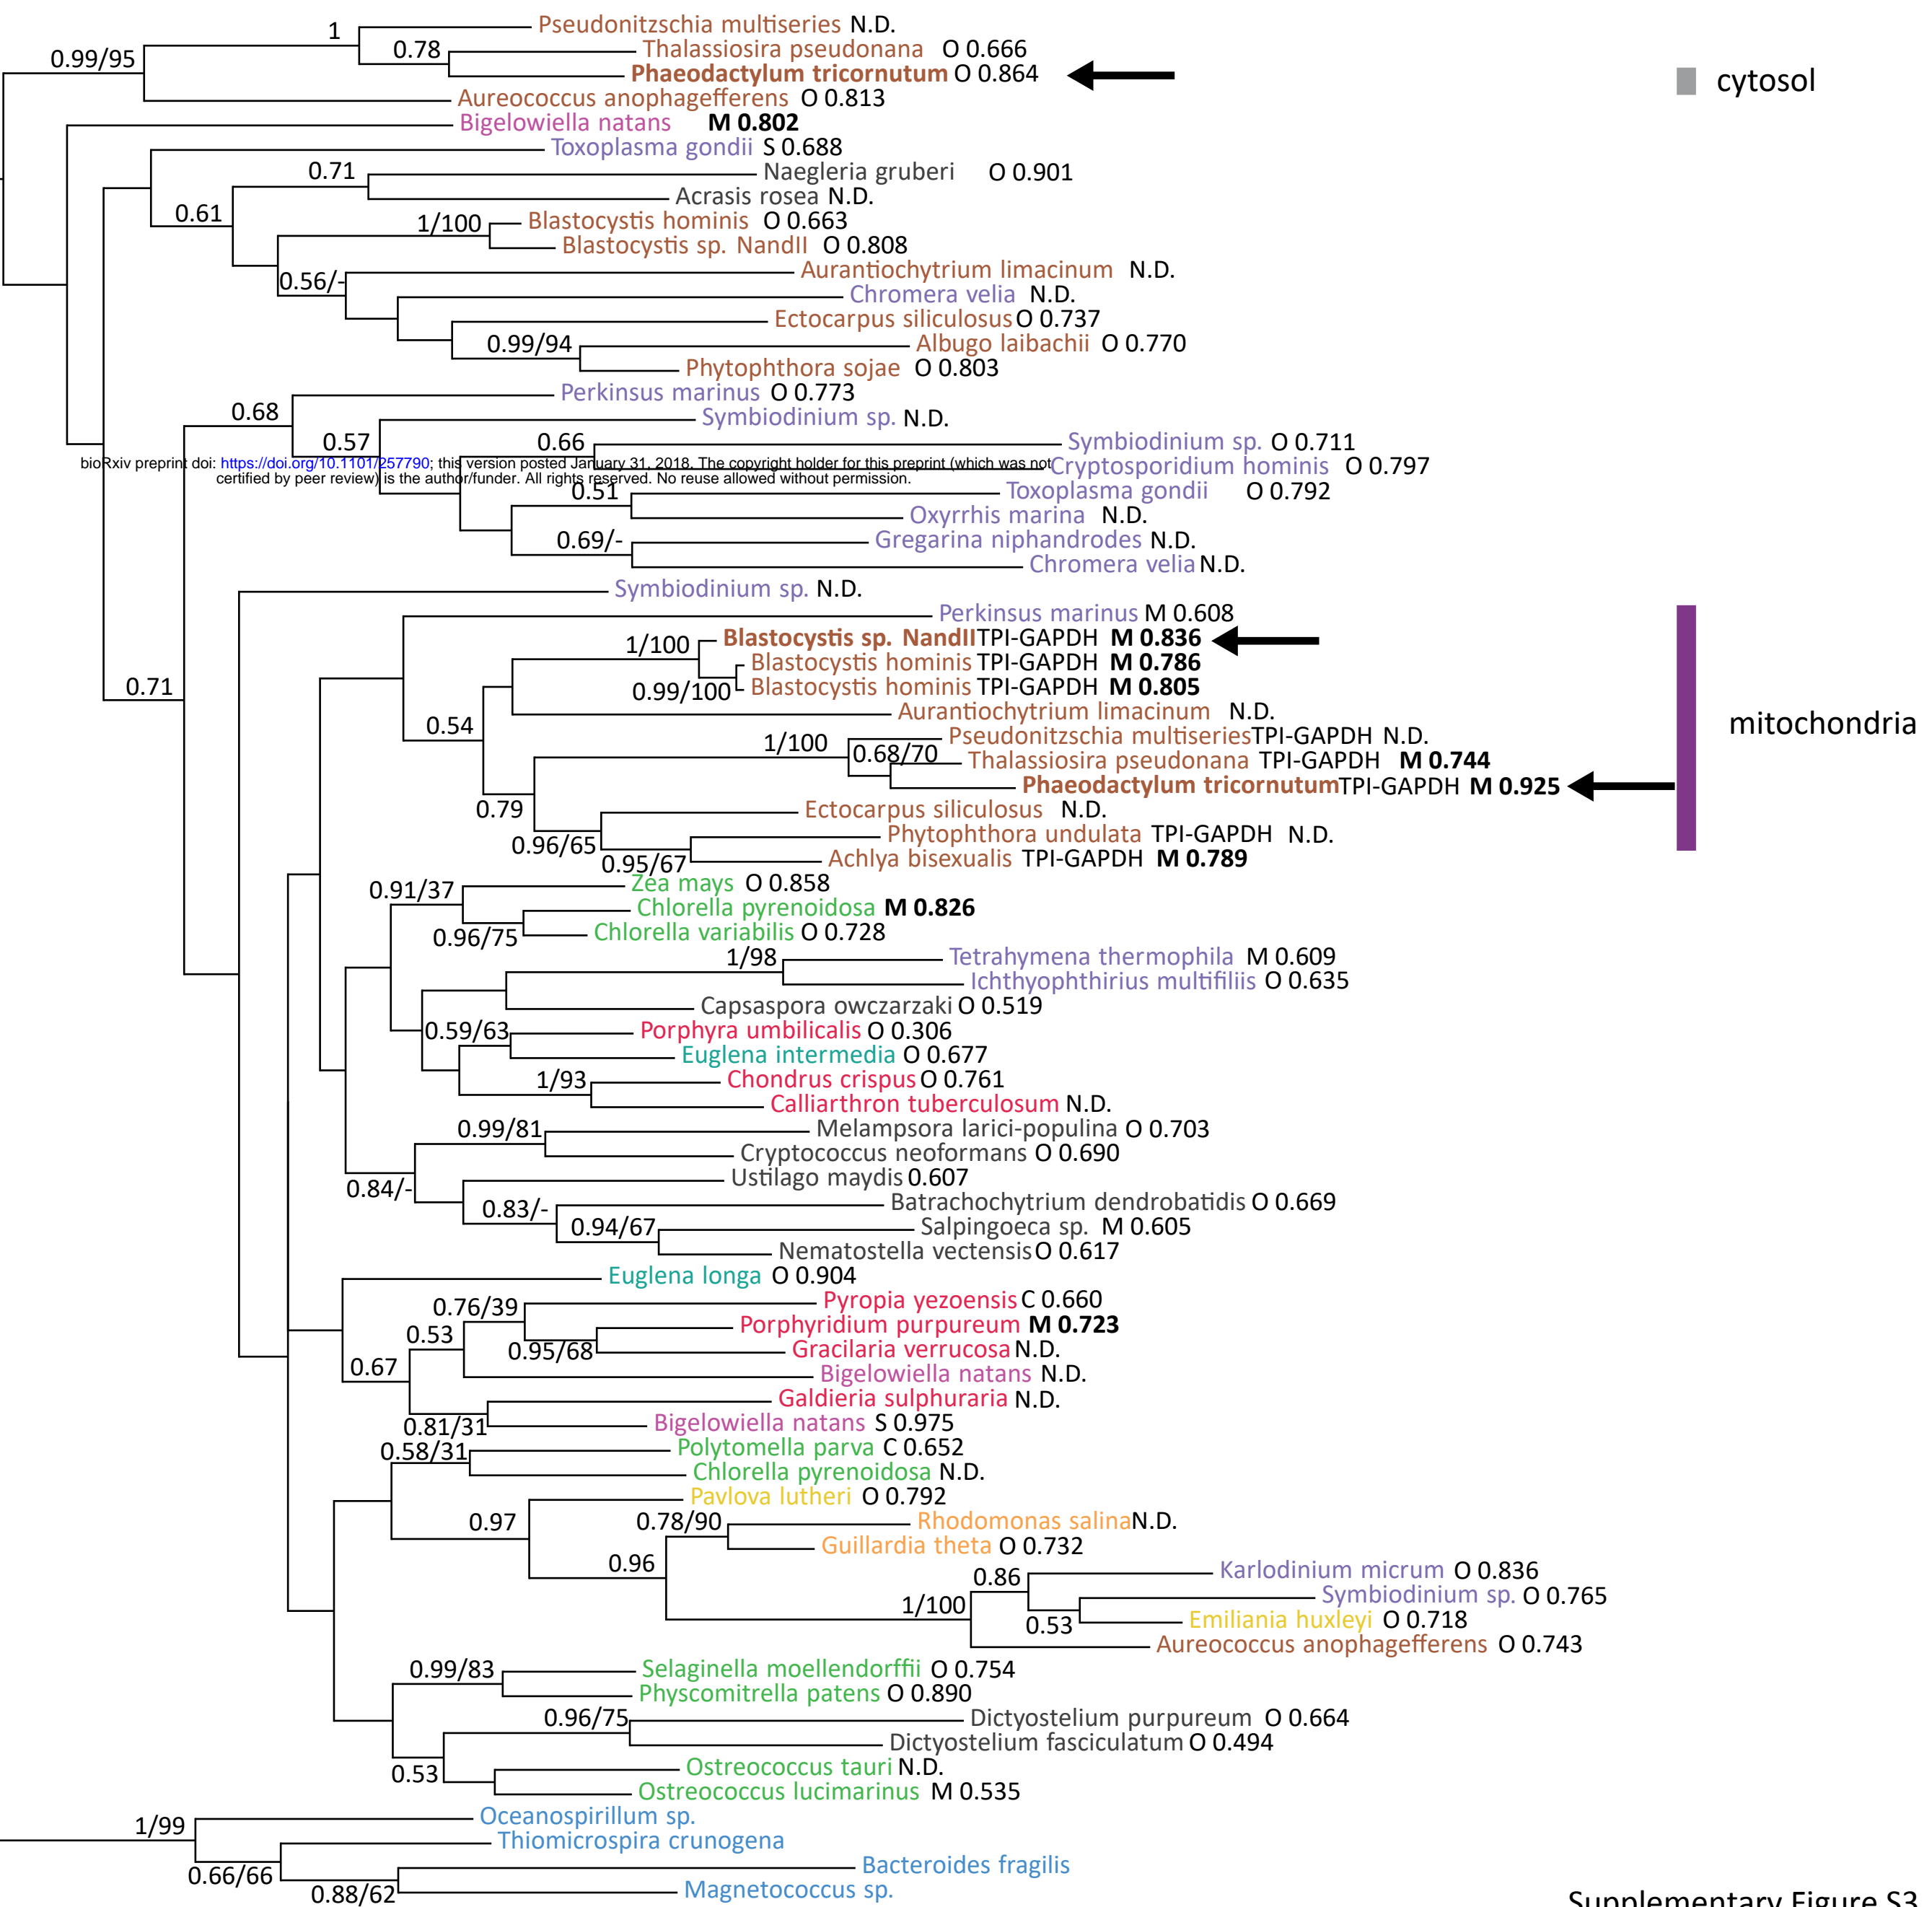

Supplementary Figure S3



# B. GAPDH

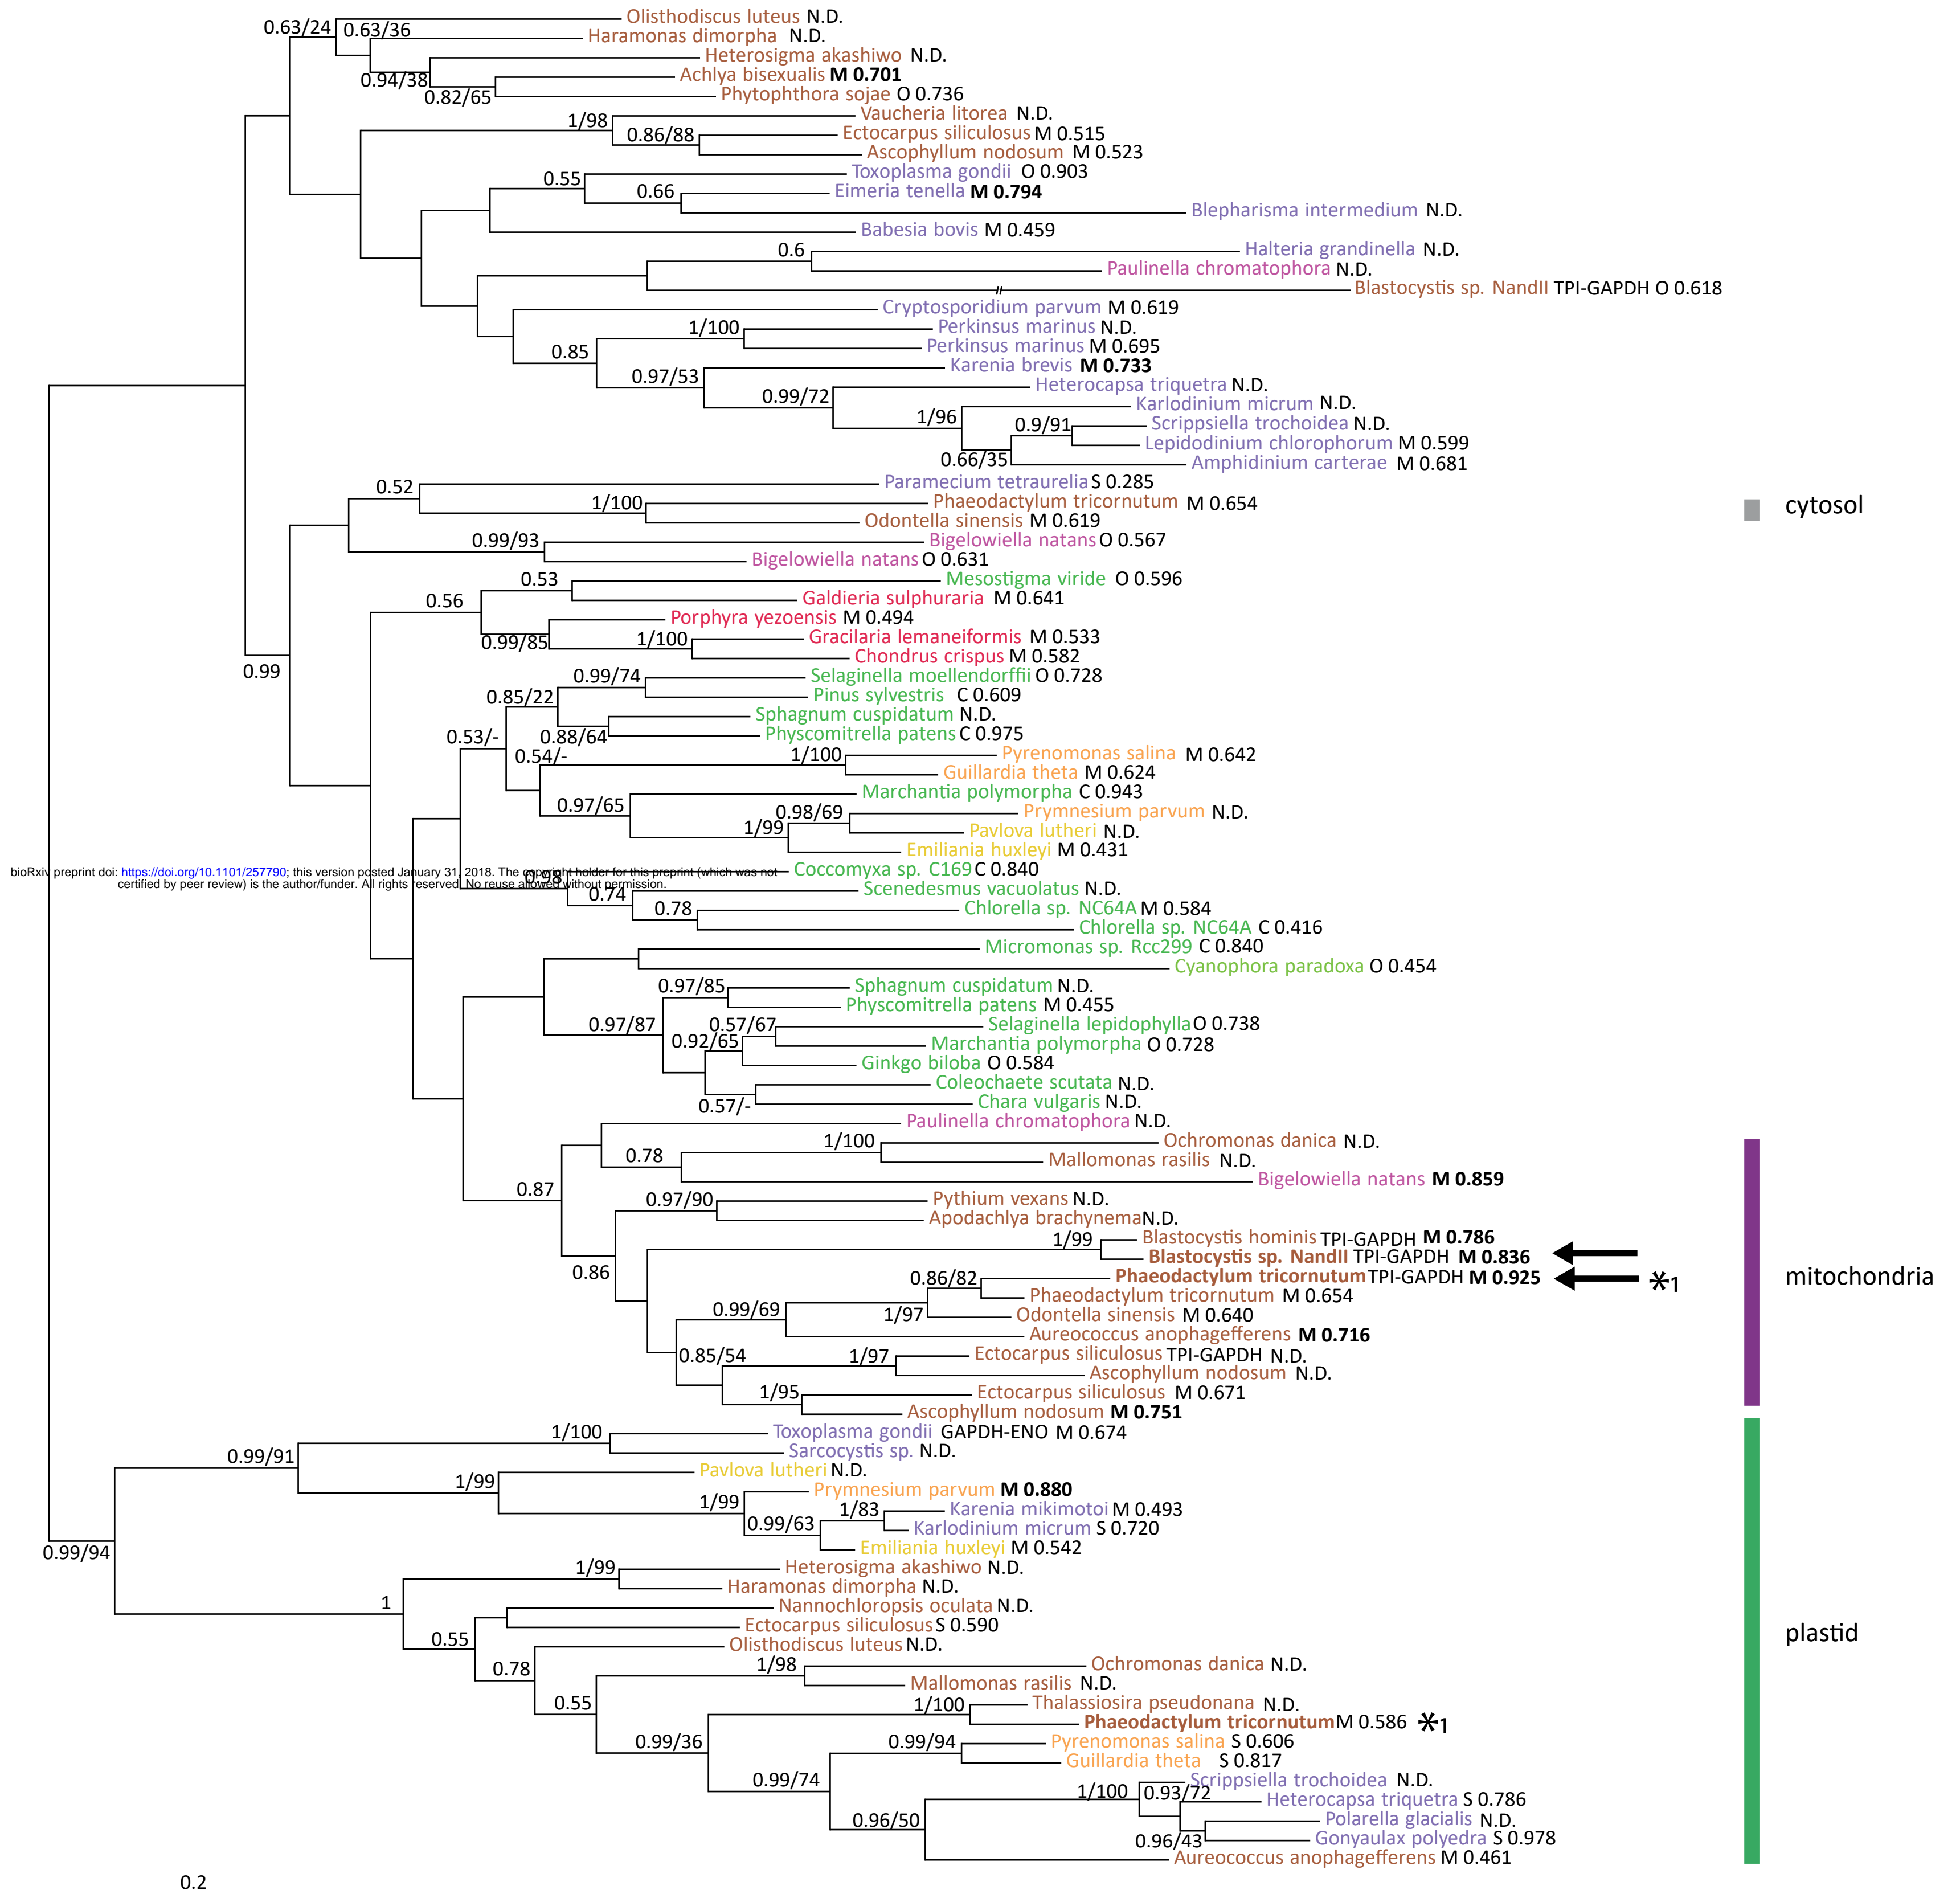

# C. PGK

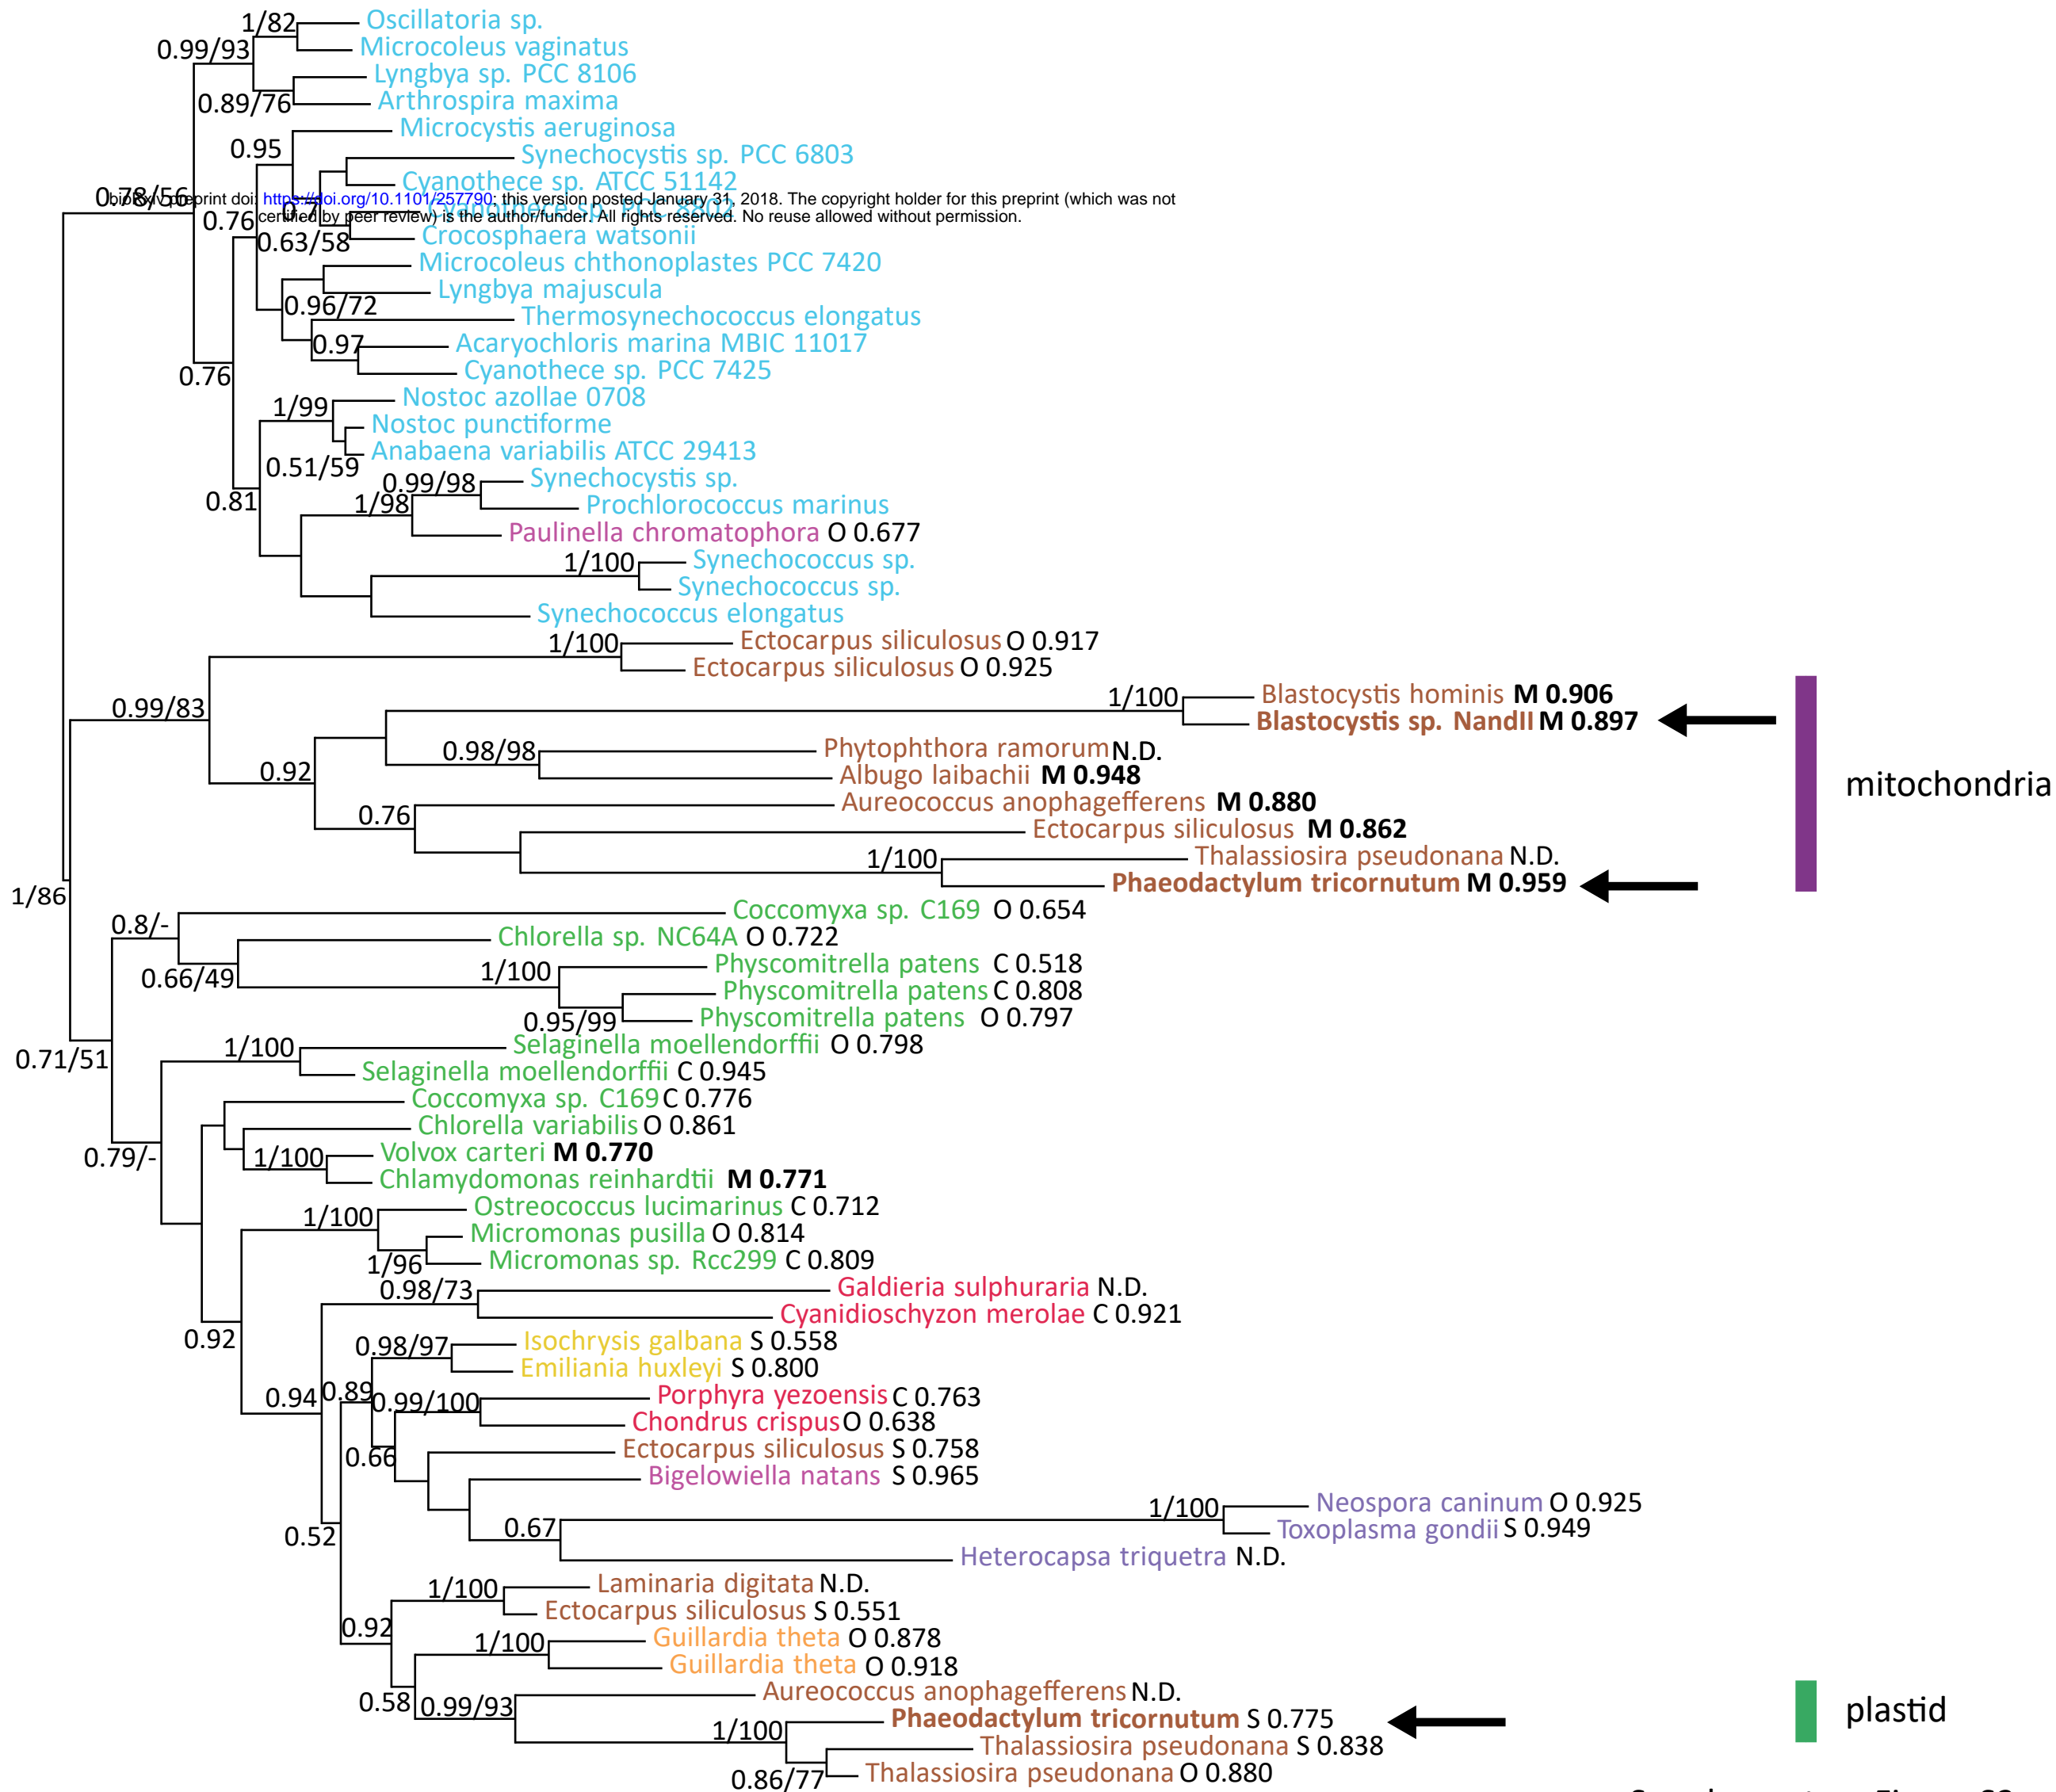

# D. PGM

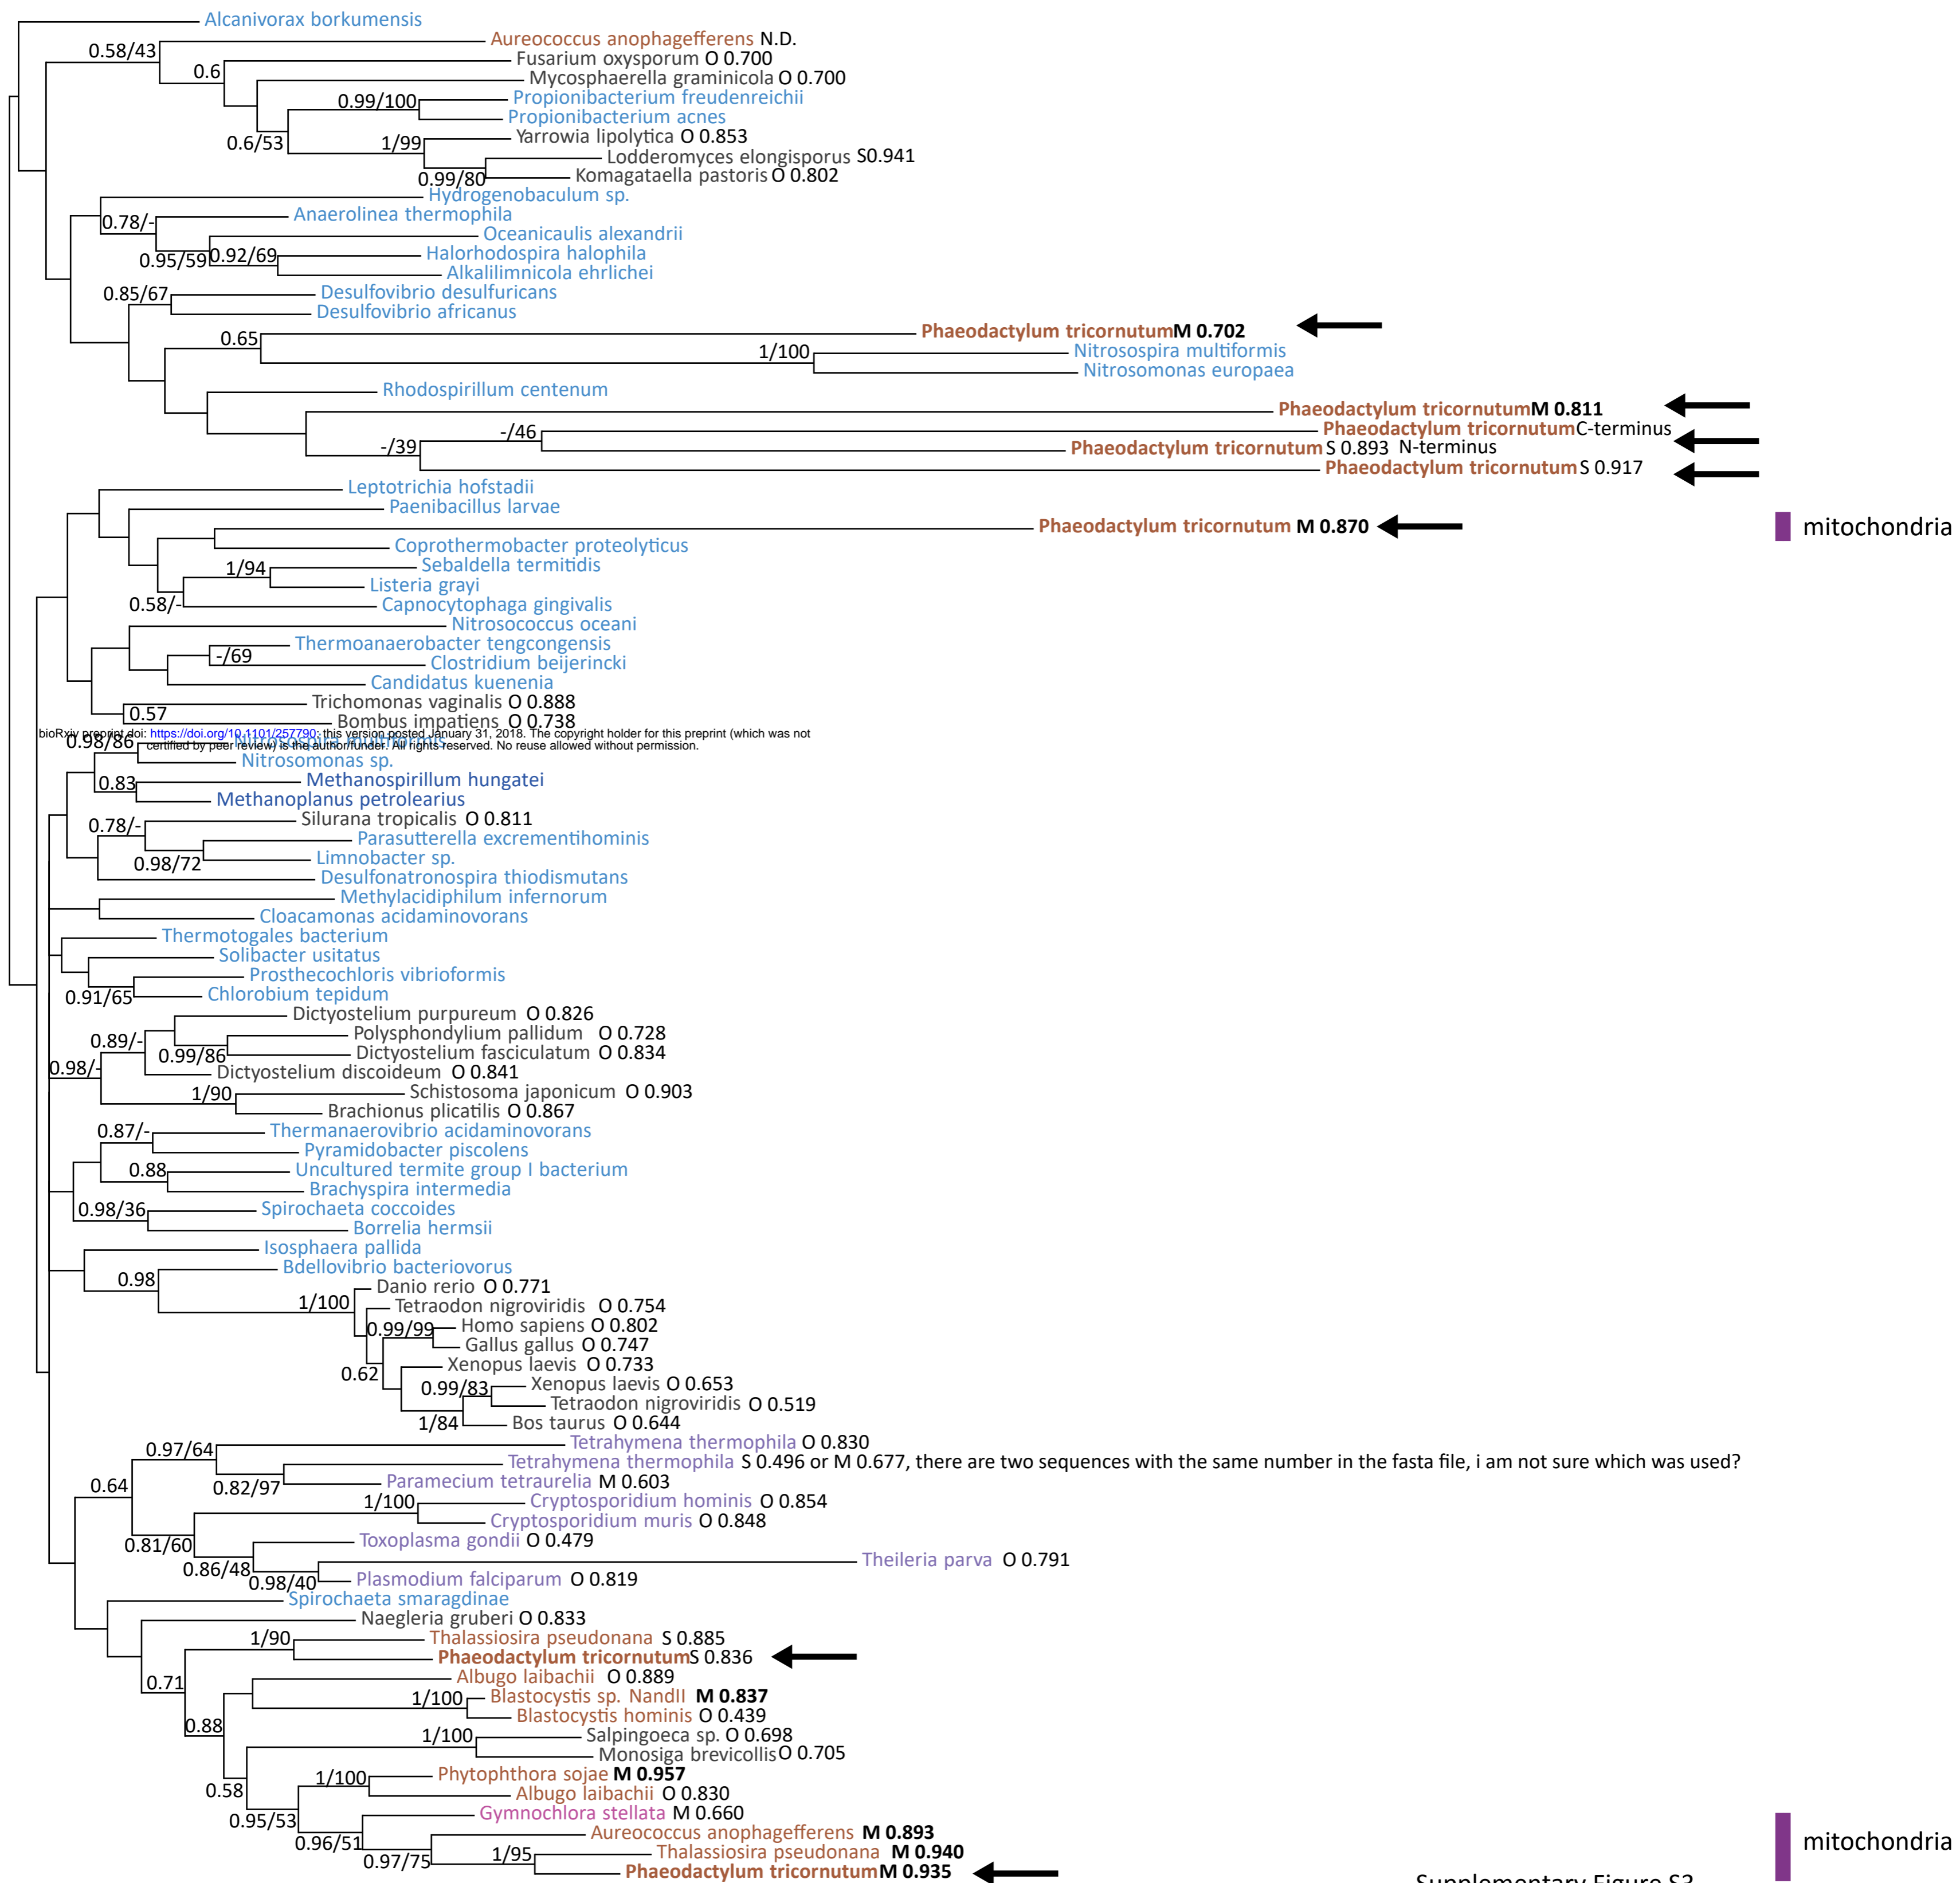



# E. ENO

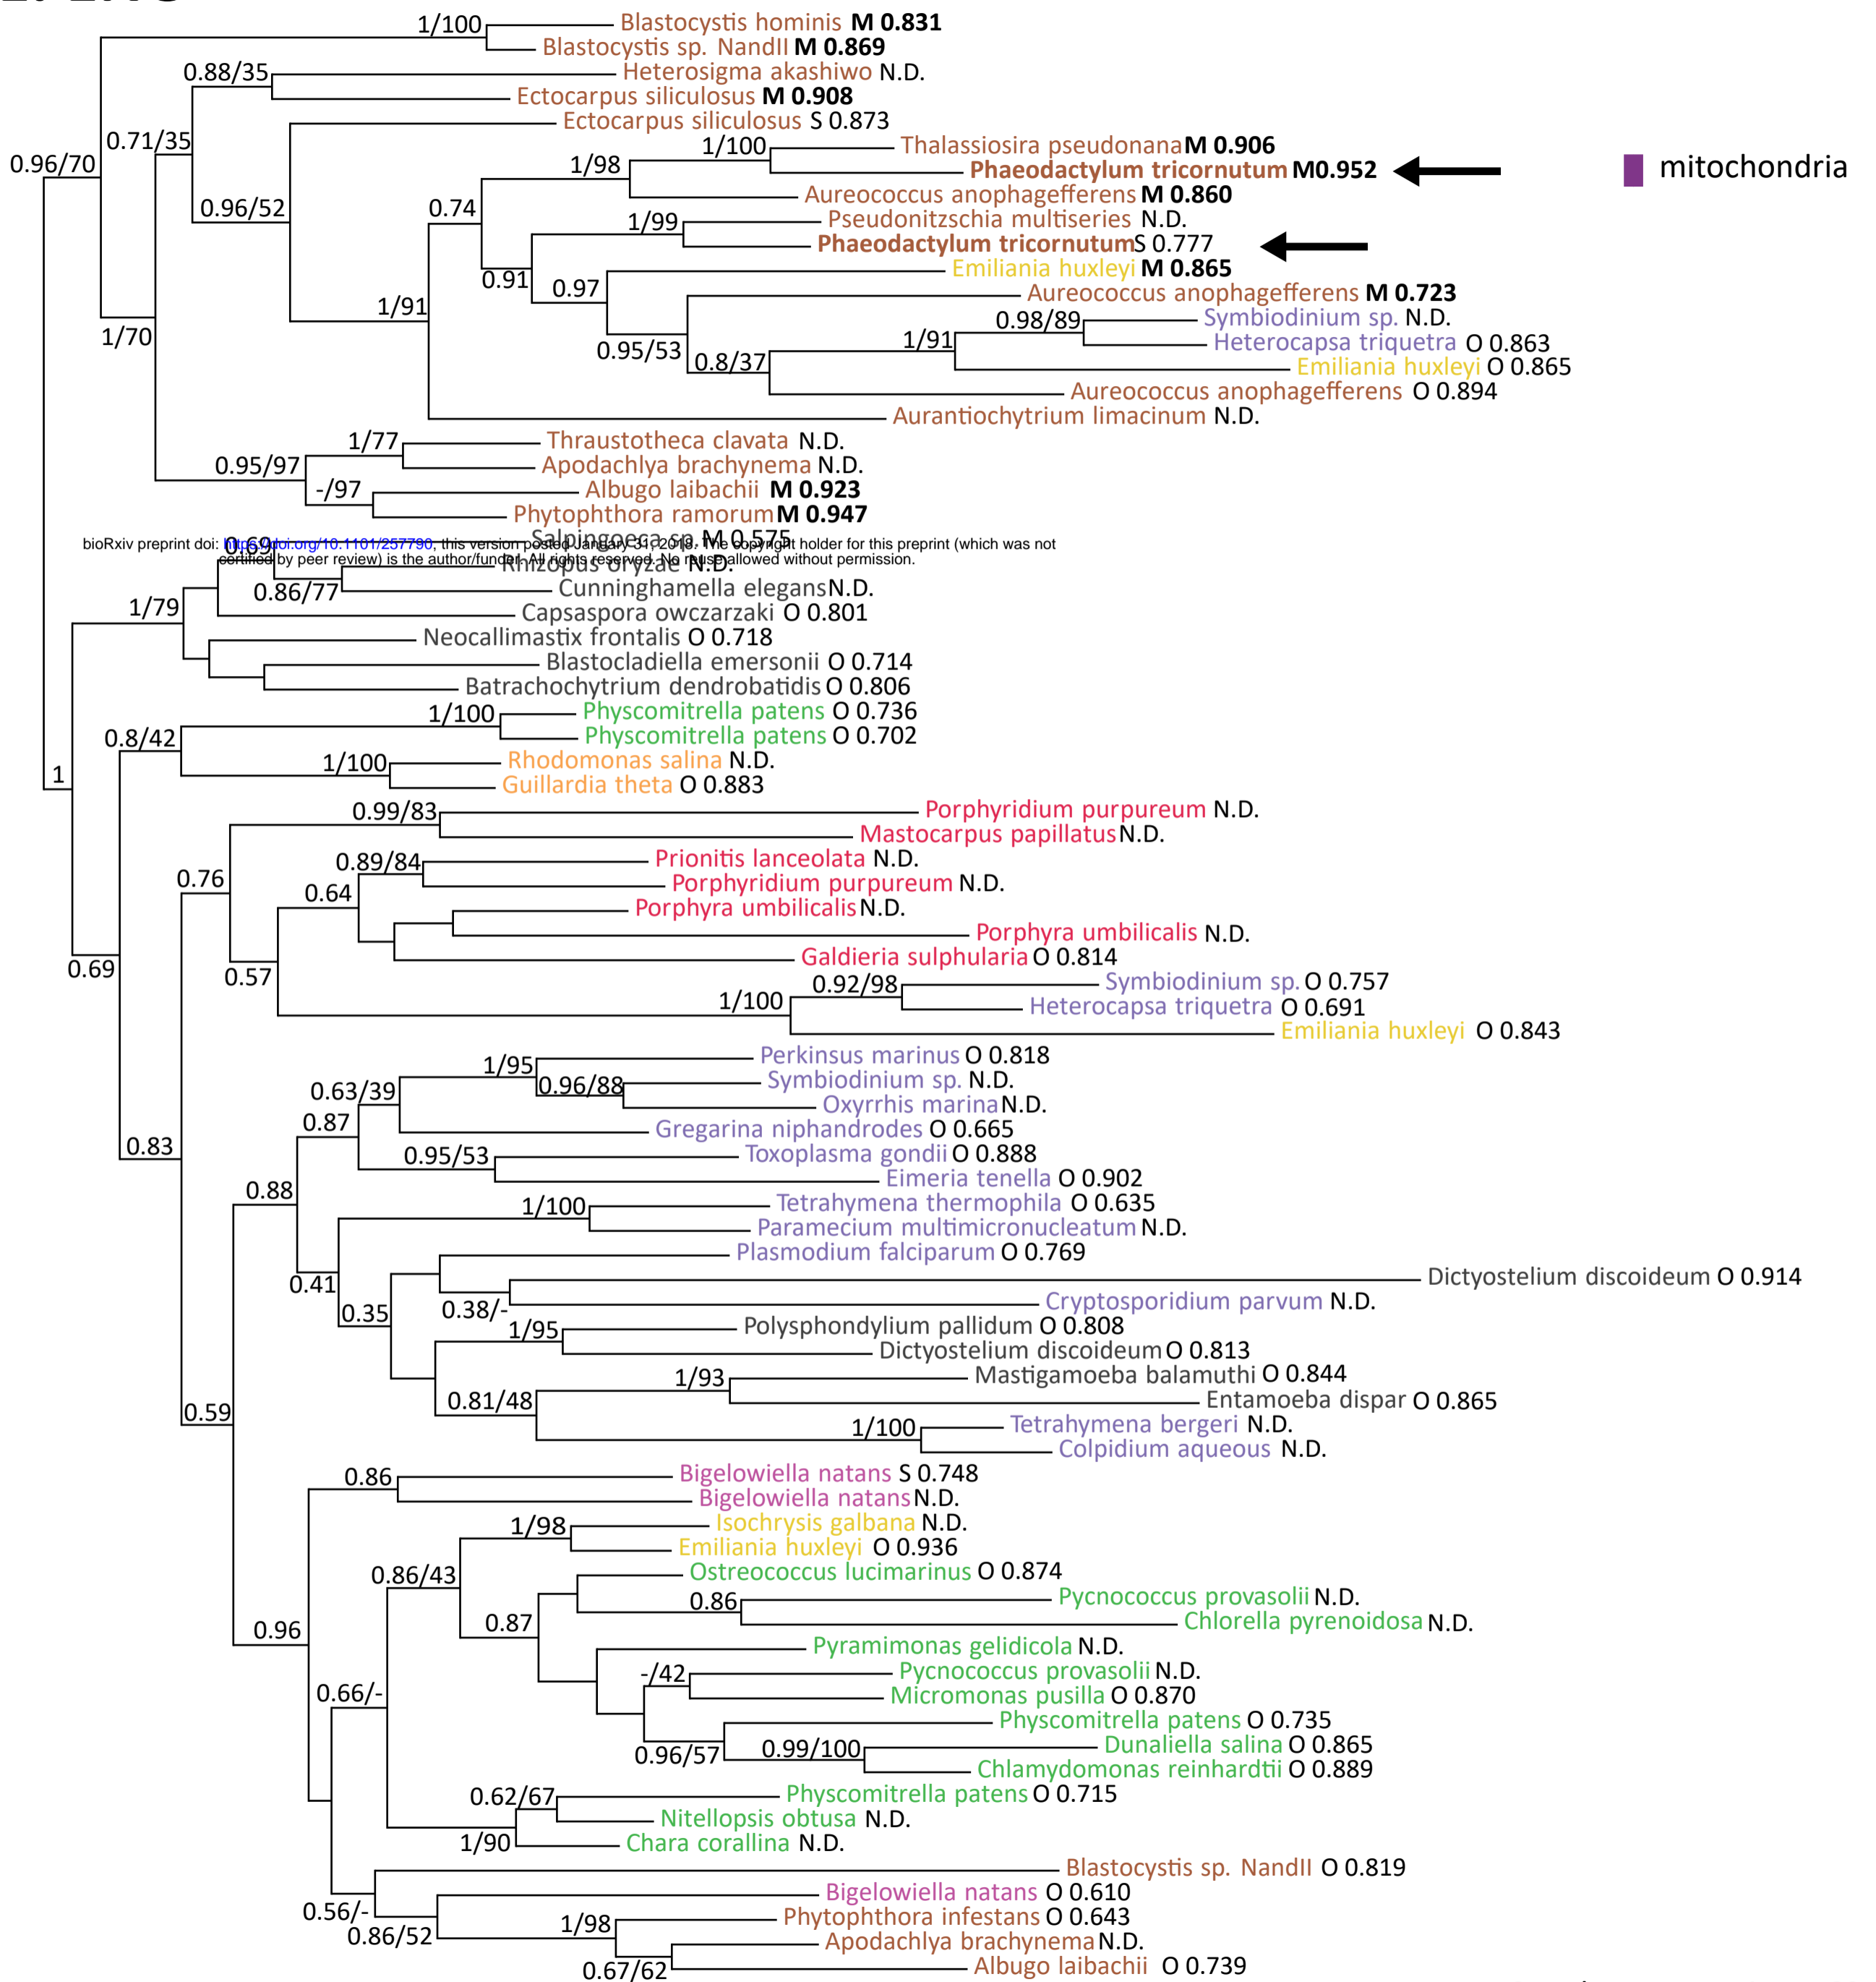





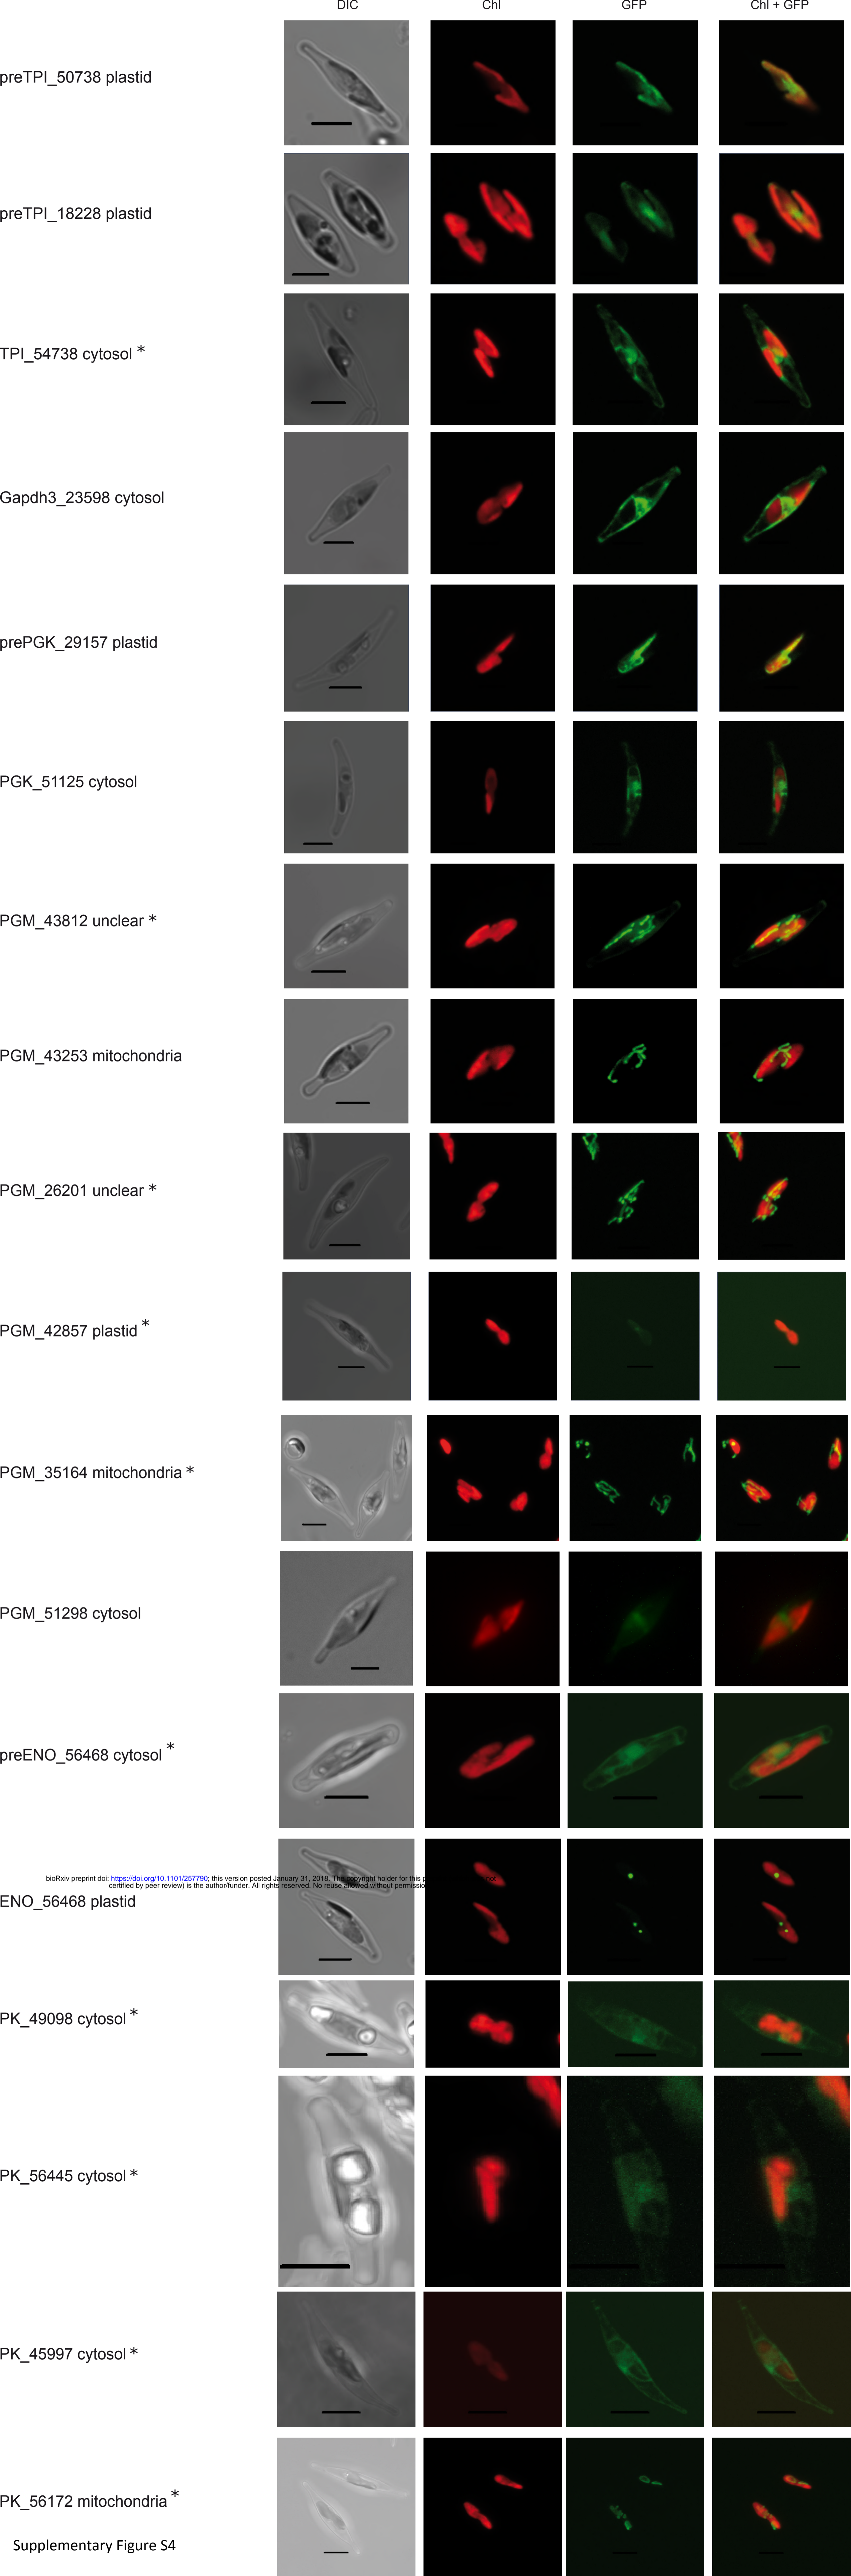

## 1 **Materials and methods**

2

### 3 **Sources of cDNA and genomic DNA**

4 DNA and cDNA from *Blastocystis* ST1 strain NandII, obtained from a symptomatic human (strain  
5 obtained from the American Type Culture Collection, ATCC 50177), was used in this study. Genomic  
6 and cDNA libraries of *Phaeodactylum tricornutum* (culture from SAG strain: 1090-1a, Göttingen)  
7 were constructed with the “Lambda ZAP II XR library Construction Kit” from Stratagene and the  
8 lambda vector EMBL3, respectively. *P. tricornutum* Bohlin (strain 646; University of Texas Culture  
9 Collection, Austin) RNA was isolated using TRIzol following manufactures protocol (Thermo Fisher,  
10 Germany) and cDNA synthesis was performed with the reverse Transcription system (A3500,  
11 Promega, Germany). An *Achlya bisexualis* cDNA library<sup>1</sup> was kindly provided by D. Bhattacharya  
12 (Rutgers University). Screening of libraries, sequencing of positive clones and RACE analyses were  
13 performed as described<sup>2</sup>. *Phytophthora infestans* RNA extracted from *P. infestans* mycelia with the  
14 RNAeasy Plant Kit from Quiagen and cDNA was synthesized with the Thermo-RT Kit (Display  
15 Systems, England). Sequences were also obtained from the EST/genome sequencing programmes  
16 from *Phaeodactylum tricornutum*<sup>3</sup> and <http://genome.jgi-psf.org/Phatr2/Phatr2.home.html> (JGI)<sup>4</sup>,  
17 from *Phytophthora infestans* (<http://www.pfgd.org><sup>5</sup>) and from *P. sojae* and *P. ramorum*  
18 (<http://www.jgi.doe.gov><sup>6</sup>).

19

### 20 **GFP constructs for the stable transformation of *Phaeodactylum tricornutum***

21 Standard cloning procedures were applied<sup>7</sup>. Polymerase chain reaction (PCR) was performed with a  
22 Master Cycler Gradient (Eppendorf) using Taq DNA Polymerase (Q BIOgene) according to the  
23 manufacturer’s instructions. cDNA from *Blastocystis* ST1 strain NandII (BI), *Phaeodactylum*  
24 *tricornutum* (Pt), *Phytophthora infestans* (Pi) and *Achlya bisexualis* (Ab) was used as template for the  
25 PCR reactions. For *Saccharina latissima* (SI) a cDNA clone (ABU96661) was used as template.

26

27 Table 1: PCR primers for production of GFP fusion constructs.

|       | Forward primer                                                     | Reverse primer                                                    |
|-------|--------------------------------------------------------------------|-------------------------------------------------------------------|
| BITPI | AGGCCTATGCTTCCCGTTCCTCCGTCATTGCCCGTTCCTTC<br>GGCTCCGCCGCTCGCAAGCTC | GAGCTTGCAGCGCGGAGCCGAAGGAACGGGCAATGA<br>CGGAGGAACGGGAAAGCATAGGCCT |
| BIPGK | AGGCCTATGCTTCCGCCTTCTCGAAGCGTCTC<br>TTTTCCACGGCCGTACCGTCAAC        | GTTGACGGTACGGCCGGTGGAAAAGAGACG<br>CTTCGAGAAGGCGAAAGCATAGGCCT      |
| PtTIG | CCGAATTCTTGTTCTTCCTTG                                              | GGCCATGGAACCGTTGCATTTCCAG                                         |
| PiTIG | CCGAATTCTGAGCTCATTCTCG                                             | GGCCATGGCCGTGTTAAGCATTCC                                          |
| SITIG | GAATTCATGTTCTCCGAGC                                                | CGCCATGGACCGTTGCACCTCCAG                                          |



|                |                            |                          |
|----------------|----------------------------|--------------------------|
| PtPGK          | GCCCCGGGAGCAAATACCGCAACTCC | GCCCATGGCTTGCTGGGCCAGTTG |
| PtPGM          | CCGAATTCCTCCCAAGGTGC       | GGCCATGGGCGAGTCGTACCATC  |
| PtENO          | CCGAATCCCGTATTGTTCTGATTCCG | GGCCATGGTTCCTGCGCCGTCG   |
| PtPK           | CCGAATTCCTATCGGCGCAGTAA    | GGCCATGGCTCCGGTAACGGGC   |
| PtPGM          | GCGAATTCGTCTCAGCATGG       | CGCATGGCCTCCTTATTG       |
| AbPK           | CCGGATCCAACAGTCGTGTGTTG    | GGCCATGGTCATCGAAAAAGCATC |
| PtTPI50738     | ATTGAGCTTCCAGTTTCCCG       | TTCTCCACCGATGACTGGTG     |
| PtTPI18228     | CTGTACAACGCTCACCATG        | ATTCAGTTTCCAGTTGCC       |
| PtTPI54738     | CGAACAAATGCCTCGC           | CTGTTCTAGCAGATCTTTGGC    |
| PtGAPDH3_23598 | ATCACCATGCCCGTGAAATGC      | CTCATACTAAAAGAGGGTTC     |
| PtPGK29157     | CCCACCATGAAATTCGTTT        | GGCAAAGCTACGGACACC       |
| PtPGK51125     | AGTCACACCATGGCTTCCGAC      | TAGCAAGGCGGGCACTCC       |
| PtPGM43812     | GAATGGGCAGGAGAACAC         | GGGAATGGGCGGTAAAG        |
| PtPGM43253     | CCAAGCATTGCGAAAATGGCATC    | GGTGGAGCGGGATCGC         |
| PtPGM26201     | CAGGCATGTTGGTTCCTCATC      | TATTGCAGCCCGCCAG         |
| PtPGM42857     | GGTCATCATGGCAATGGACG       | CTGGGGAGGCTTCCAAAG       |
| PtPGM35164     | CTGTCCCGACCATGAG           | GGGCTCCTCCACGGCCG        |
| PtPGM51298     | GAGACGATGTGCGACGAATCACG    | GCAGTCAACCCAACCAAGT      |
| PtENO56468pre  | ACCGTTGTCATGCTTTTCAAG      | ATTGCCCGGGGAATC          |
| PtENO56468     | ACCGTTGTCATGCTTTTCAAG      | GAAAGTCACCTTGCTGC        |
| PtPK49098      | TTCACCATGACAGCGTCTC        | GGTGGCCCCACGCTG          |
| PtPK56445      | CAGAATGTCCTTGTCCAG         | AATTCGTCCGCGCGTATAC      |
| PtPK45997      | AAAGTCCAACAGACG            | CTAGTGTGTTACAACGT        |
| PtPK56172      | CAGATATAATGTTCCGTCGAGCCG   | CAGTCGCATGATGCGCATCC     |

28

29 PCR products were cloned into TA-vector PCR 2.1 (Invitrogen) or blunt cloned into pBluescript II SK+  
30 (Stratagene). The primers (Table 1) allowed insertion of restriction enzyme recognition sites  
31 (*EcoRI/NcoI* or *SmaI/NcoI*) that were used to clone the presequences in frame to eGFP within  
32 pBluescript-GFP. The presequence-GFP fusions were cut out with appropriate restrictions enzymes  
33 (*EcoRI/HindIII* or *SmaI/HindIII*) and cloned into the *Phaeodactylum tricornutum* transformation vector  
34 pPha-T1<sup>8,9</sup>, either into the corresponding sites or, in case of *SmaI*, into the *EcoRV* site. For the  
35 constructs with Protein ID (Fig. S4) a slightly different cloning approach was used. PCR with a proof  
36 reading Polymerase (*Pfu* or Kapa Hifi) were used to amplify corresponding fragments from cDNA.  
37 These fragments were cloned blunt end in a modified pPha-T1 Vector. These Vectors include an eGFP  
38 with a *StuI* or *KspAI* restriction site, allowing a one-step cloning procedure, with subsequent screening  
39 for the correct orientation of the fragment at the N-terminus of eGFP. The *Blastocystis* presequences  
40 were produced by kinasing the primers using T4 polynucleotide kinase using manufacturer's  
41 procedures and subsequently annealing in a thermal cyclor after which they were cloned into the  
42 diatom expression vector equipped with eGFP and the *StuI* restriction site.

43

#### 44 Transformation of *Phaeodactylum tricornutum*

45 *Phaeodactylum tricornutum* Bohlin (UTEX, strain 646) was grown at 22 °C under continuously light of  
46 75 µE in artificial seawater (Tropic Marin) at a 0.5 concentration. Transformations were performed  
47 as described by Zaslavskaja *et al.*<sup>8,10</sup>. For each transformation, tungsten particles M10 (0.7 µm



48 median diameter) covered with 7-20 µg DNA were used to bombard cells with the Particle Delivery  
49 System PDS-1000 (Bio-Rad, HE-System) prepared with 650, 900, 1100 or 1350 psi rupture discs.

50

#### 51 **Microscopic analysis of transformed *Phaeodactylum tricorutum***

52 Reporter gene expression was visualized using confocal laser scanning microscopy (cLSM-510META,  
53 Carl Zeiss, Jena, Germany) using a Plan-Neofluar 40x/1.3 Oil DIC objective. The eGFP fusion proteins  
54 were excited with an argon laser at 488 nm with 8-10% of laser capacity. Excited fluorophores were  
55 detected with a bandpass filter GFP (505-530 nm) using a photomultiplier. Chlorophyll *a*  
56 autofluorescence was simultaneously detected with a META-channel (644-719 nm). MitoTracker  
57 Orange CM-H<sub>2</sub>TMRos (Molecular Probes) was applied for fluorescence staining of mitochondria.  
58 *P. tricorutum* cells were stained according to the protocol of the manufacturer. Cells were  
59 incubated with 100 nM dye solution, incubated for 30 minutes, washed and observed (images were  
60 recorded using the Multitracking mode with the following parameters for Wavelength T1 = 488 nm  
61 10% and T2 = 543 nm 100% laser line, primary beam splitting mirrors UV/488/543/633 nm; emitted  
62 light was detected with the META-channel).

63

#### 64 **Protein production and antibody generation**

65 *Blastocystis* TPI-GAPDH was amplified from cDNA using primers TPI-GAPDH pET F: aga aga CAT ATG  
66 TTC GTC GGT GGC AAT TGG AAG TGC AA and TPI-GAPDH pET R: tct tct GGA TCC TTA AGA GCG ATC  
67 CAC CTT CGC CA adding *NdeI* and *BamHI* restriction sites, respectively, to facilitate cloning in gene  
68 expression vector pET14b (Novagen, Merck, Whatford, UK). The *Blastocystis* PGK was amplified from  
69 cDNA using PGK pET F: aga aga CAT ATG AAG CTG GGA GTT GCT GCC TAC G and PGK pET R: tct tct  
70 CAT ATG TCA CGC GTC CGT CAG AGC GGC CAC ACC C which added *NdeI* restriction sites for pET14b  
71 cloning. The mitochondrial targeting signals were not amplified as these would not be part of the  
72 mature processed protein. All constructs were confirmed by sequencing. The in-frame His-tag  
73 allowed for affinity chromatography purification of the recombinant protein. Recombinant  
74 *Blastocystis* TPI-GAPDH and PGK were used to immunise guinea pigs and rabbits, respectively, for  
75 polyclonal antibody generation at Eurogentec (Seraing, Belgium).

76

77

78 **Culture conditions for *Blastocystis***

79 *Blastocystis* isolate B (originally designated *Blastocystis* sp. group VII<sup>11</sup>, now called ST7<sup>12</sup>) was used.  
80 The parasite was grown in 10 ml pre-reduced Iscove's modified Dulbecco's medium (IMDM)  
81 supplemented with 10% heat-inactivated horse serum. Cultures were incubated for 48 h in  
82 anaerobic jars using an Oxoid Anerogen pack at 37 °C. Two-day-old cultures were centrifuged at  
83 1600 g for 10 min, washed once in a buffer consisting of 30 mM potassium phosphate, 74 mM NaCl,  
84 0.6 mM CaCl<sub>2</sub> and 1.6 mM KCl, pH 7.4 and resuspended in an a nitrogen gassed isotonic buffer  
85 consisting of 200 mM sucrose (pH 7.2) containing 30 mM phosphate, 15 mM mercaptoethanol, 30  
86 mM NaCl, 0.6 mM CaCl<sub>2</sub>, and 0.6 mM KCl (pH 7.2).

87

88 **Subcellular fractionation of *Blastocystis***

89 *Blastocystis* cells were broken by mixing 2 volumes of the cell suspension with 3 volumes of 0.5 mm  
90 beads and broken by 3 one minute duration shakes at maximum speed on a bead breaker (VWR mini  
91 bead mill homogenizer, Atlanta, GA, USA) with one-minute pauses on ice. Cell-free extracts were  
92 subjected to increasing centrifugal force producing nuclear (N, 1,912 RCF<sub>av</sub> for 5 min), mitochondria-  
93 like (ML, 6,723 RCF<sub>av</sub> for 15 min), lysosomal (L, 26,892 RCF<sub>av</sub> for 30 min) and cytosolic (S) fractions,  
94 respectively, using a using a Sorvall RC-2B centrifuge fitted with an SS-34 rotor.

95

96 **Enzyme assays**

97 Hexokinase was assayed by measuring the reduction of NAD<sup>+</sup> at 340 nm in a coupled reaction with  
98 *Leuconostoc mesenteroides* glucose-6-phosphate dehydrogenase (3 EU), containing 38 mM Tris-HCl  
99 pH 7.6, 115 mM D-glucose, 10 mM MgCl<sub>2</sub>, 0.5 mM ATP, 0.2 mM NAD<sup>+</sup>, 0.05 mL of *Blastocystis* cell-  
100 free extract (0.08-0.12 mg) or fraction (N, 0.15-0.18 mg; ML, 0.12-0.17 mg; L, 0.08-0.11 mg; S, 0.09-  
101 0.05 mg), in a final volume of 1 mL at 25 °C.

102 Phosphoglucose isomerase was assayed by measuring contained g the reduction of NADP<sup>+</sup> at 340 nm  
103 in a coupled reaction with *Leuconostoc mesenteroides* glucose-6-phosphate dehydrogenase (2 EU),  
104 containing 38 mM Tris-HCl pH 7.6, 3.3 mM D-fructose-6-phosphate, 0.66 mM β-NADP<sup>+</sup>, 3.3 mM  
105 MgCl<sub>2</sub>, 0.05 mL of *Blastocystis* cell-free extract or fraction in a final volume of 3 mL at 25 °C.

106 Phosphofructokinase was assayed using the standard coupled assay containing 38 mM Tris-HCl pH  
107 7.6, 5 mM dithiothreitol, 5 mM MgCl<sub>2</sub>, 0.28 mM NADH, 0.1 mM ATP, 0.1 mM AMP, 0.8 mM fructose-

108 6-phosphate, 0.4 mM  $(\text{NH}_4)_2\text{SO}_4$ , 0.05 EU each of rabbit muscle aldolase, rabbit muscle  
109 glycerophosphate dehydrogenase, and rabbit muscle triosephosphate isomerase, 0.05 mL of  
110 *Blastocystis* cell-free extract or fraction in a final volume of 3 mL at 25 °C.

111 Aldolase was assayed using a modification of the hydrazine method in which 3-  
112 phosphoglyceraldehyde reacts with hydrazine to form a hydrazone which absorbs at 240 nm; the  
113 assay contained 12 mM fructose-1,6-bisphosphate, pH 7.6, 0.1 mM EDTA, 3.5 mM hydrazine sulfate  
114 and 0.05 mL of *Blastocystis* cell-free extract or fraction in a final volume of 3 mL at 25 °C.

115 Triosephosphate isomerase was assayed by measuring the oxidation of NADH using a linked reaction  
116 with glycerol-3-phosphate dehydrogenase; 220 mM triethanolamine pH 7.6, 0.20 mM DL-  
117 glyceraldehyde-3-phosphate, 0.27 mM NADH, 1.7 EU glycerol-3-phosphate dehydrogenase, and 0.05  
118 mL of *Blastocystis* cell-free extract or fraction in a final volume of 3 mL at 25 °C.

119 Glyceraldehyde-3-phosphate dehydrogenase was assayed by measuring the initial reduction of  $\text{NAD}^+$   
120 at 340 nm; the assay contained 13 mM sodium pyrophosphate pH 8.0, 26 mM sodium arsenate, 0.25  
121 mM NAD, 3.3 mM dithiothreitol, and 0.05 mL of *Blastocystis* cell-free extract or fraction in a final  
122 volume of 3 mL at 25 °C.

123 Phosphoglycerate kinase was assayed by measuring the 3-phosphoglycerate dependent oxidation of  
124 NADH at 340 nm; the assay contained 40 mM Tris-HCl pH 8.0, 0.5 mM  $\text{MgCl}_2$ , 0.26 mM NADH, 0.1  
125 mM ATP, 2 EU *S. cerevisiae* glyceraldehydephosphate dehydrogenase, and 0.05 mL of *B. hominis* cell  
126 free extract or fraction in a final volume of 3 mL at 25 °C.

127 Phosphoglycerate mutase was measured using the standard coupled assay and measuring the  
128 decrease in absorbance at 340 nm; the assay contained 76 mM triethanolamine pH 8.0, 7 mM D(-) 3-  
129 phosphoglyceric acid, 0.7 mM ADP, 1.4 mM 2,3-diphosphoglyceric acid, 0.16 mM NADH, 2.6 mM  
130  $\text{MgSO}_4$ , 100 mM KCl, 5 EU pyruvate kinase/8 EU lactate dehydrogenase from rabbit muscle, 5 EU  
131 rabbit muscle enolase, and 0.05 mL of *Blastocystis* cell-free extract or fraction in a final volume of 3  
132 mL at 25 °C.

133 Enolase was determined using the standard coupled assay and measuring the decrease in  
134 absorbance at 340 nm; the assay contained 80 mM triethanolamine pH 8.0, 1.8 mM D(+) 2-  
135 phosphoglycerate, 0.1 mM NADH, 25 mM  $\text{MgSO}_4$ , 100 mM KCl, 1.3 mM ADP, 5 EU pyruvate kinase/8  
136 EU lactate dehydrogenase from rabbit muscle, and 0.05 mL of *Blastocystis* cell-free extract or  
137 fraction in a final volume of 3 mL at 25°C.

138 Pyruvate kinase was determined by measuring the oxidation of NADH at 340 nm using the following  
139 mixture, 45 mM imidazole-HCl pH 8.0, 1.5 mM ADP, 0.2 mM NADH, 1.5 mM phosphoenolpyruvate, 5  
140 EU rabbit muscle lactate dehydrogenase, and 0.05 mL of *Blastocystis* cell-free extract or fraction in a  
141 final volume of 3 mL at 25 °C.

142 Pyruvate phosphate dikinase was assayed spectrophotometrically by measuring the oxidation of  
143 NADH at 340 nm in 3 mL cuvettes. The reaction contained HEPES buffer (pH 8.0), 6 mM MgSO<sub>4</sub>, 25  
144 mM NH<sub>4</sub>Cl, 5 mM dithiothreitol, 0.1 mM disodium pyrophosphate, 0.25 mM AMP, 0.1 mM  
145 phosphoenolpyruvate, and 0.05-0.25 mg of *Blastocystis* cell-free extract or fraction. The rate of  
146 pyruvate production was determined by the addition of 2 U of lactate dehydrogenase and 0.25 mM  
147 NADH, and compared to controls with phosphoenolpyruvate but lacking AMP, and those containing  
148 AMP but lacking phosphoenolpyruvate. The concentration of AMP, pyrophosphate and  
149 phosphoenolpyruvate used in the assay was selected from preliminary assays using varying  
150 concentrations from 0.025-1.0 mM. The generation of ATP from AMP by pyruvate phosphate  
151 dikinase was confirmed by measuring the ATP formed using a luciferin/luciferase assay (Molecular  
152 Probes, In Vitrogen, Eugene, OR, USA). The assay was performed as described above but lacking  
153 lactate dehydrogenase and NADH, after varying times 0, 15, 30, 45 and 60 min 0.1 mL of the assay is  
154 removed and added to one well of a 96 well plate containing 0.1 mL of 0.25 µg firefly luciferase and  
155 0.5 mM luciferin and the luminescence recorded using a Spectra Max M2 plate reader (Molecular  
156 Devices, Sunnyvale, CA).

157 The activity of pyrophosphate dependent phosphofructokinase\* in the direction of fructose-1,6-  
158 bisphosphate formation (forward reaction) was determined in 1 mL assay volumes containing 0.1 M  
159 HEPES-HCl, pH 7.8; 20 mM fructose-6-phosphate; 2 mM Na pyrophosphate; 5 mM MgCl<sub>2</sub>; 0.25 mM  
160 NADH; 0.2 U of aldolase (from rabbit muscle); and 0.3 U each of glycerophosphate dehydrogenase  
161 (from rabbit muscle) and triosephosphate isomerase (from rabbit muscle), 10 µM fructose 2,6  
162 diphosphate. The reaction was initiated by addition of 0.05-0.25 mg of *Blastocystis* cell-free extract  
163 or fraction, and the rate of NADH oxidation was followed at 340 nm on a Beckman DU 640  
164 spectrophotometer (Indianapolis, IN, USA). The activity of the reverse reaction was determined by  
165 measuring orthophosphate-dependent formation of fructose-6-phosphate from fructose-1,6-  
166 bisphosphate. The reaction mixture (1 mL) contained 0.1 M HEPES-HCl, pH 7.8; 2 mM fructose-1,6-  
167 bisphosphate; 15 mM NaH<sub>2</sub>PO<sub>4</sub>; 5 mM MgCl<sub>2</sub>; 0.3 mM NADP<sup>+</sup> and 0.12 U glucose- 6-phosphate  
168 dehydrogenase and 0.24 U glucose phosphate isomerase. The reaction was initiated by addition of 1  
169 mg of pyrophosphate dependent phosphofructokinase and monitored at 340 nm. \*Pyrophosphate  
170 fructose-6-phosphate 1-phosphotransferase (PPF).

171

172 **Confocal microscopy of *Blastocystis***

173 *Blastocystis* trophozoites were treated with MitoTracker Red (Molecular Probes), washed, fixed in  
174 10% formalin and incubated in ice cold acetone for 15 minutes and air-dried.

175 Slides with fixed parasites were rehydrated in phosphate buffered saline (PBS) for 30 minutes and  
176 blocked with 2% BSA in PBS for 1 hour at room temperature. All antibody incubations were  
177 performed at room temperature in 2% BSA in PBS, 0.1% triton X-100. Slides were washed 5 times in  
178 0.2 % BSA in PBS, 0.01% triton X-100 between incubations to remove unbound antibodies.

179 Primary antibodies: Rabbit, anti-PGK; Guinea Pig, anti-TPI-GAPDH (Eurogentec, Seraing, Belgium)  
180 were used at a dilution of 1:500 and 1:300 in 2% BSA in PBS, 0.1% triton X-100, respectively.

181 Secondary antibodies: Alexa Fluor 488 conjugated Goat anti-Rabbit (Invitrogen, Eugene, OR, USA),  
182 Alexa Fluor 405 conjugated Goat anti-Rabbit (Invitrogen, Eugene, OR, USA), TRITC-conjugated Goat  
183 anti-Guinea Pig were used at 1:200 dilutions in 2% BSA in PBS, 0.1% triton X-100, each.

184 The DNA intercalating agent 4'-6-Diamidino-2-phenylindole (DAPI) for detection of nuclear and  
185 mitochondrial DNA was added to the final but one washing solution at a concentration of  $1 \mu\text{g}\cdot\text{ml}^{-1}$ .  
186 The labeled samples were embedded in Dako Glycergel Mounting Medium (DAKO, Carpinteira, CA,  
187 USA) and stored at 4 °C.

188 Immunofluorescence analysis and image data collection was performed on a Leica SP2 AOBS  
189 confocal laser-scanning microscope (Leica Microsystems, Wetzlar, Germany) using a glycerol  
190 immersion objective lens (Leica, HCX PL APO CS 63x 1.3 Corr). Image z-stacks were collected with a  
191 pinhole setting of Airy 1 and twofold oversampling. Image stacks of optical sections were further  
192 processed using the Huygens deconvolution software package version 2.7 (Scientific Volume  
193 Imaging, Hilversum, NL). Three-dimensional reconstruction, volume and surface rendering, and  
194 quantification of signal overlap in the 3D volume model were generated with the Imaris software  
195 suite (Version 7.2.1, Bitplane, Zurich, Switzerland). The degree of signal overlap in the 3D volume  
196 model is depicted graphically as scatterplots. The intensity of two fluorescent signals in each voxel of  
197 the 3D model is measured and plotted. Voxels with similar signal intensity for both signals appear in  
198 the area of the diagonal. All image stacks were corrected for spectral shift before rendering and  
199 signal colocalization analysis.

200

201

## 202 **Phylogenetic analyses**

203 Sequences of all glycolytic enzymes from *Phaeodactylum tricornutum* and *Blastocystis* ST1, strain  
204 NandII, were used as seeds in BlastP searches in the non-redundant database at the NCBI<sup>13</sup>. We  
205 were especially interested to identify all sequences in the SAR supergroup<sup>14</sup> (Stramenopiles,  
206 Alveolates and Rhizaria). In addition, representatives from other eukaryotic groups were added and,  
207 if required, closely related bacterial sequences. Sequences were automatically added to pre-existing  
208 alignments and subsequently manually refined using the Edit option of the MUST package<sup>15</sup>. Final  
209 datasets were generated after elimination of highly variable regions and positions with more than  
210 50% gaps by G-blocks<sup>16</sup>. All datasets were first analysed with a maximum likelihood (ML) method  
211 under two different models. PhyML v2.3<sup>17</sup> was used with the SPR moves option and the LG+F+4G  
212 model<sup>18</sup> and PhyML v3 (with SPR moves) was used using the C20+4G model, corresponding to 20  
213 pre-calculated fixed profiles of positional amino-acid substitution<sup>18</sup>. Based on the likelihood values  
214 (l), the number of parameters (K) and alignment positions (n), the AIC (AIC= -2l +2K) and the  
215 corrected AIC (AICc; AIC+ 2K(K+1)/n-K-1) was calculated<sup>19</sup>. The lowest AICc value corresponds to the  
216 best tree, if the value of the C20 analysis was better, then a second ML analysis under the C40+4G  
217 model was performed and the AICc value estimated, until the overall best model was found. If the  
218 AICc of C40 is better than C20 then C60 was tested. Once the best model was estimated for all six  
219 datasets, a rapid bootstrap analysis with 100 replicates in RAxML v7 under the LG model was  
220 performed<sup>20</sup> and an additional analysis in Phylobayes v3 with the CATfix C20 model in all cases or,  
221 alternatively, the best C-model. Two independent chains were run for 10,000 points and trees are  
222 sampled at every tenth points<sup>21</sup>. Trees obtained with the best model are presented and both  
223 posterior probabilities (PP) and rapid bootstrap values (BS) are indicated on trees if PP>0.5 or BS  
224 >30%, respectively.

225

## 226 **Cellular localisation predictions**

227 TargetP<sup>22</sup> and MitoProt<sup>23</sup> were used to analyse putative subcellular localization. Using the non-plant  
228 and no cut-offs settings. In case of Viridiplantae, Rhodophyta and Glaucocystophyta the plant results  
229 were taken, if non-plant results differ.

230

231

## 232 **References**

- 233 1     Bhattacharya, D., Stickel, S. K. & Sogin, M. L. Molecular phylogenetic analysis of actin genic  
234       regions from *Achlya bisexualis* (Oomycota) and *Costaria costata* (Chromophyta). *J Mol Evol*  
235       **33**, 525-536 (1991).
- 236 2     Liud, M. F., Brandt, U., Scherzinger, M. & Cerff, R. Evolutionary origin of cryptomonad  
237       microalgae: two novel chloroplast/cytosol-specific GAPDH genes as potential markers of  
238       ancestral endosymbiont and host cell components. *J Mol Evol* **44 Suppl 1**, S28-37 (1997).
- 239 3     Maheswari, U. *et al.* The Diatom EST Database. *Nucleic Acids Res* **33**, D344-347,  
240       doi:10.1093/nar/gki121 (2005).
- 241 4     Bowler, C. *et al.* The *Phaeodactylum* genome reveals the evolutionary history of diatom  
242       genomes. *Nature* **456**, 239-244 (2008).
- 243 5     Tripathy, S., Pandey, V. N., Fang, B., Salas, F. & Tyler, B. M. VMD: a community annotation  
244       database for oomycetes and microbial genomes. *Nucleic Acids Res* **34**, D379-381,  
245       doi:10.1093/nar/gkj042 (2006).
- 246 6     Tyler, B. M. *et al.* *Phytophthora* genome sequences uncover evolutionary origins and  
247       mechanisms of pathogenesis. *Science* **313**, 1261-1266, doi:10.1126/science.1128796 (2006).
- 248 7     Sambrook, J., Fritsch, E. & Maniatis, T. *Molecular cloning, a laboratory manual*. (Cold Spring  
249       Harbor Laboratory Press, 1989).
- 250 8     Zaslavskaja, L. A., Lippmeier, J. C., Kroth, P. G., Grossman, A. R. & Apt, K. E. Transformation of  
251       the diatom *Phaeodactylum tricornutum* (Bacillariophyceae) with a variety of selectable  
252       marker and reporter genes. *J. Phycol.* **36**, 379-386 (2000).
- 253 9     Gruber, A. *et al.* Protein targeting into complex diatom plastids: functional characterisation  
254       of a specific targeting motif. *Plant Mol Biol* **64**, 519-530, doi:10.1007/s11103-007-9171-x  
255       (2007).
- 256 10    Kroth, P. Genetic transformation - a tool to study protein targeting in diatoms. *Methods in*  
257       *Molecular Biology* **390**, 257-268 (2007).
- 258 11    Noel, C. *et al.* Molecular phylogenies of *Blastocystis* isolates from different hosts:  
259       implications for genetic diversity, identification of species, and zoonosis. *J Clin Microbiol* **43**,  
260       348-355, doi:10.1128/JCM.43.1.348-355.2005 (2005).
- 261 12    Stensvold, C. R. *et al.* Terminology for *Blastocystis* suntypes - a consensus. *Trends Parasitol*  
262       **23**, 93-96 (2007).
- 263 13    Altschul, S. F., Gish, W., Miller, W., Myers, E. W. & Lipman, D. J. Basic local alignment search  
264       tool. *J. Mol. Biol.* **215**, 403-410 (1990).
- 265 14    Adl, S. M. *et al.* The revised classification of eukaryotes. *J Eukaryot Microbiol* **59**, 429-493,  
266       doi:10.1111/j.1550-7408.2012.00644.x (2012).
- 267 15    Philippe, H. MUST, a computer package of management utilities for sequences and trees.  
268       *Nucleic.Acids.Research.* **21**, 5264-5272 (1993).
- 269 16    Talavera, G. & Castresana, J. Improvement of phylogenies after removing divergent and  
270       ambiguously aligned blocks from protein sequence alignments. *Syst Biol* **56**, 564-577,  
271       doi:10.1080/10635150701472164 (2007).
- 272 17    Guindon, S. & Gascuel, O. A simple, fast, and accurate algorithm to estimate large  
273       phylogenies by maximum likelihood. *Syst. Biol.* **52**, 696-704 (2003).
- 274 18    Le, S. Q., Lartillot, N. & Gascuel, O. Phylogenetic mixture models for proteins. *Philos Trans R*  
275       *Soc Lond B Biol Sci* **363**, 3965-3976, doi:10.1098/rstb.2008.0180 (2008).
- 276 19    Posada, D. & Buckley, T. R. Model selection and model averaging in phylogenetics:  
277       advantages of akaike information criterion and bayesian approaches over likelihood ratio  
278       tests. *Syst Biol* **53**, 793-808, doi:10.1080/10635150490522304 (2004).
- 279 20    Stamatakis, A., Hoover, P. & Rougemont, J. A Rapid Bootstrap Algorithm for the RAxML Web  
280       Servers. *Systematic Biology* **57**, 758-771, doi:10.1080/10635150802429642 (2008).
- 281 21    Lartillot, N., Lepage, T. & Blanquart, S. PhyloBayes 3: a Bayesian software package for  
282       phylogenetic reconstruction and molecular dating. *Bioinformatics* **25**, 2286-2288,  
283       doi:10.1093/bioinformatics/btp368 (2009).

- 284 22 Emanuelsson, O., Brunak, S., von Heijne, G. & Nielsen, H. Locating proteins in the cell using  
285 TargetP, SignalP and related tools. *Nat Protoc* **2**, 953-971, doi:10.1038/nprot.2007.131  
286 (2007).
- 287 23 Claros, M. G. & Vincens, P. Computational method to predict mitochondrially imported  
288 proteins and their targeting sequences. *Eur. J. Biochem.* **241**, 779-786 (1996).
- 289



1 **Amino acid sequences of mitochondrial targeting sequences used in GFP targeting experiments as**  
2 **seen in Supplementary Figure S2.**

3

4 **A.**

5 >preTPI-GAPDH-GFP (*Blastocystis*) (OAO12326)

6 MLSRSSVIARISFGSAARKL

7

8 >prePGK-GFP (*Blastocystis*) (OAO15536)

9 MLSAFSKRLFSTGRTVN

10

11 **B.**

12 >preTPI-GAPDH-GFP (*Phaeodactylum*) (NCBI AF063804)

13 MLASSRTAAASVQRMSSRAFHASSLTEARKFFVGGNWKCNCS

14

15 >prePGK-GFP (*Phaeodactylum*) (JGI 48983)

16 MLFRMLTSTALRRSPVTTSLTCCCKANAFVIRIRSFHAAPVIQAKMTVEQLAQQ

17

18 >prePGM-GFP (*Phaeodactylum*) (JGI 33839)

19 MFAVSRSSFLLATRVKTLRSFAAVQAADKHTLVLLRHGESTWNLENKFTGWYDCP

20

21 >preENO-GFP (*Phaeodactylum*) (JGI 1572)

22 MMWSRPVLRNISTTRASSSSRRFLSAITGVHGREIDSRGNPTVEVDVTTAQQGT

23

24 >prePK-GFP (*Phaeodactylum*) (JGI 49002)

25 MMRSFLRHAQGRACAQHLRTIGTLRLNQMPVTGA

26

27 **C.**

28 >preTPI-GAPDH-GFP (*Phytophthora infestans*) (NCBI X64537)

29 MSFRQVFKTQARHMSSSRKFFVGGNWKCNCSLGQAQELVGMLNTA

30

31 >prePGM-GFP (*Phytophthora infestans*) (PFGD Pi\_011\_55705\_Feb05.seq)

32 MVLALRRPLAISSRVANRSLGMLRQQQKAMKHTHTLVLIIRHGESEWNKKNLFTGWYDVQLSEKGNKEA

33

34 >prePK-GFP (*Achlya bisexualis*) (NCBI AAU81895)

35 MLARSLRSRAVRSFARGLSNKPSKNDAFSMT

36

37 >preTPI-GAPDH-GFP (*Saccharina latissima*) (NCBI ABU96661)

38 MFSAAALSAAGAKAPSAARGFASSASRMSGKFFVGGNWKNGS

1 ***Phaeodactylum tricornutum* amino acid sequences used in GFP targeting experiments as seen in**  
2 **Supplementary Figure S4.**

3

4 >preTPI\_50738 plastid (pre-sequence) (JGI 50738) plastid

5 MTGDSTSLLDLISPDREPRQRKEPSRWIAFSVFPFVRFIPEAFATRLPYSIVMKFLALSVAALISSATAFAPTFR  
6 GSPASTTASTTSLAARKPFISGNWKLN

7

8 >preTPI\_18228 plastid (pre-sequence) (JGI 18228) plastid

9 MKFLALSVAALISSATAFAPTFRGGSPASTTASTTSLAARKPFISGNWKLN

10

11 >TPI\_54738 cytosol (242 Amino acids) (JGI 54738) cytosol

12 MPRPDGSSTPAEGERKYLAVAGNWKCNGLASNEELVKTFFNEAGPIPSNVEVAICCPSLYLPQLLSSLRDDIQIG  
13 AQDCGVNDKNGAFTGEIGAFQIKDIGCDWVIIGHSERRDGFEMPGETPDLCACKTRVAIDAGLKVMFCIGEKKEQ  
14 REDGTTMDVCASQLEPLAAVLTESDWSSIAIAYEPVWAIGTGLTATPEMAQETHASIRDWISQNVSADVAGKVRI  
15 QYGGSMKGANAKDLLEQ

16

17 >Gapdh3\_23598 cytosol (full length) (JGI 23598) cytosol

18 MPVKCLVNGFGRIGRLCFRYAWDDPELEIVHVNDVCSCEAAYLVQYDSVHGTWSKSVVAAEDSQSFTVDGKLV  
19 FSQEKDFTKIDFASLGVDMVMECTGKFLTVKTLQPYFGMGVQVVSAPVKEDGALNVVLGCNHQKLTDDHTLVT  
20 NASCTTNCLAPVVKVIQENFGIKHGCITTIHDVTGTQTLVDMPTTKKSDLRRRARGMTNLCPTSTGSATAIVEIY  
21 PELKGLNGLAVRVPLLNASLTDCVFEVNKEVTVEEVNAALKKASESGPLKGIILGYETKPLVSTDYDNDTRSSII  
22 DALSTQVIDKTMIKIYAWYDNEAGYSKRMAELCNIVAAMNITGQEPSFKYE

23

24 >prePGK\_29157 plastid (pre-sequence) (JGI 29157) plastid

25 MKFVQAAIFALAASASTTAAAFAPAKTFGVRSFAP

26

27 >PGK\_51125 cytosol (193 Amino acids) (JGI 51125) cytosol

28 MASDMPKLPAGATRKRNVFDVIEALQKQSAKTILVRVDFNVPMNSDGKITDDSRIRGALPTIKAVVNAKCNVAVL  
29 SHMGRPRLVQKAADDEETRQQRHELKSLKPVADHLAKLLDQEVLFQDDCLHAQSTIRELPAEGGGVCLLENLRFYK  
30 EEEKNGEDFRKTLASYADGYVNDVAFGTSHRAHASVAGVPALLP

31

32 >PGM\_43812 unclear (130 Amino acids) (JGI 43812) unclear localization,  
33 cytosol plus ER or mitochondria

34 MGRRTTHRRLFPALALIFAELIMSTAYSRAWRTSAACTTTTGTACSRSRRIATTRKVRRSRPNPCNPWHPVAFS  
35 FGTSSRRRCRSGSLYGEIDADAEGPDSADRSVPTPSTTSSLSRSETLPPIPP

36

37 >PGM\_43253 mitochondria (112 Amino acids) (JGI 43253) mitochondria

38 MASITLNRSRFTMITAIGMSHPRSHGTPRSLLLLLQRFSSKDWNKGTDSASRSGPVLIKKTPRSAAAALRST  
39 APSLNGSTTDSTTGAVKHHHPAHHYINGGTPCDPAPPP

40

41 >PGM\_26201 unclear (408 Amino acids) (JGI 26201) unclear, mitochondria or  
42 ER  
  
43 MLVPHPSGKAMRGLREEACRFLSSRSFGATLDATHARMGGNFVNSVQACNNGKRVCSWHQRNRRTFSVATQRNGI  
44 GHRTTQGETEAVPRRHFTSLNQSTPFQLCFLRHGQSTWNRDNIFIGWTDTPLTDDGVLEARVAGKMLHKSGIRFD  
45 EVHTSLLRRSIRTTNLALMELGQEYLPVHKHWRLNERCYGDLVGKKNKEVVMQHAGDQVKRWRRSYDEPPPPMSD  
46 DHPYHPARDPRYQNILDELPKSESLKNTVERSSLYWDEVLPALREGKTLVVGHENNLRSLLMRLEDIAPEDI  
47 NLSLPRAVPLAYRLDENLKLPLPREDGKLDEATGFLKGTWLGDDQAVSEILDRDHKQVYDTAITTNLEIGQDREKW  
48 NNWMEFIMGKPSAKQKRIGGDKQNGFAGGAAIP  
  
49  
  
50 >PGM\_42857 plastid (175 Amino acids) (JGI 42857) plastid  
  
51 MAMDAITMRKLTTLTMAVLLIVSGCEALLVFLPRRSPTFVISTRSSSTNSAGLLHLHLSKANESDGLGKWIKVSSAL  
52 DEGVAANEEKEGAFSSDYNSMNGYNTDLNRYHTMLRERGTVEALFGQRRSFVIAKRDGDENEDGWRDMRQR  
53 RPLWKHLRLPISVAKNVLWKPPQP  
  
54  
  
55 >PGM\_35164 mitochondria (351 Amino acids) (JGI 35164) mitochondria  
  
56 MRIPCRRLHPQLSAKGTTRPFQYSSSNSIDDQHRSSHLDASPRRHIVVRHGQSVWNKGSNQLERFTGWTNVGLSE  
57 NGQRQAVQAARKLHGYSIDCAYVSLQLQRSQATLRLMLEELNDQGRSEGYDDLTTDIPVISSWRLNERHYGALTG  
58 QSKLQAEQLFGKAQLDLWRYSYKIPPPMPDPTFSSWKHQAHQMATYIHHRHNRSRVIEKGNVWSSRAVMPR  
59 SEAFFDVLQRIVPLWKYGIAPRLARGETVLLVGHANSVKALLCLLDPHTVTPPTSIGALKIPNTTPLYVQLIRDYP  
60 GASTSVPASFPVLGDLRVVIPPNSSTRYPLSGTWLEDPVARDAGTAVEEP  
  
61  
  
62 >PGM\_51298 cytosol (131 Amino acids) (JGI 51298) cytosol. If a shorter  
63 version, starting from the second Methionine is used, a localization at the  
64 plastid as a blob like structure is the result (data not shown).  
  
65 MCDESRQTATPMIHFEIFRFSDDLVRQDRQAPHLSTSTVKILSDSNLHKLFIMMLRSLVLALSWTVASAFTHQS  
66 TFWGRTAVTNSRILSLSPPTDASSALCMKYMLVLRHGESTWNKENRFTGWVDCP  
  
67  
  
68 >preENO\_56468 cytosol (66 Amino acids) (JGI56468) cytosol. Start Methionine  
69 from GFP was not included in the construct.  
  
70 MLFKPSTLLALFAVAGTTLAFAPRSTTTPLTSTTRGSASSSVTTLAMSGITGVLAREILD SRGNPV  
  
71  
  
72 >ENO\_56468 plastid (443 Amino acids) (JGI56468) plastid  
  
73 MLFKPSTLLALFAVAGTTLAFAPRSTTTPLTSTTRGSASSSVTTLAMSGITGVLAREILD SRGNPTVEVEVTAD  
74 GVFRAVSPGASTDAYEAVELRDGGDRYMGKGVLAQVQNVNDILGPAVMGMDPVGQGSVDDVMLELDGTPNKANL  
75 GANAILGVSLAVAKAGAAAKVPLYRHFADLAGNLDYTMPVPCFNVIINGGSHAGNKLAFQEYFVIPTGAKSFA  
76 EAMQIGCEVYHTLTKI IKAKFGGDATLIGDEGGFAPPDNRREGCELIMEAISKAGYDGKCKIGLDVAASEFKVKG  
77 KDEYDLDFKYDGDIVSGEELGNLYQSLAADFPVITIEDPFDEDDWENWSKFTTKNGATFQVVGDDLTVTNIKIE  
78 RAIDEKACTCLLLKVNQIGSISESIAAVTKAKKAGWVMTSHRSGETEDTYIADLAVGLCTGQIKTGA  
  
79  
  
80 >PK\_49098 cytosol (507 Amino acids) (JGI: 49098) cytosol  
  
81 MTASQTKITASGPELARGANITLDTIMKKTVDVSTRQTKIVCTLGPACWEVEQLESIDAGLSIARFNFSHGDEHGH  
82 KACLDRLRQAADHKKKHVAVMLDTKGP EIRSGFFADGAKKISLVKGETIVLTSYDFKGDKHKLACSYVPLAKSV  
83 TPGQQILVADGSLVLTVLS CDEAAGEVSCRIENNAGIGERKNMNLPGVIVDLPTLTDKIDDIQNWGI VNDIDFI  
84 AASFVRKASDVHKIREVLGEKGGIKIKICKIENQEGMDNYDEILEATDAIMVARGDLGMEIPPEKVFLAQKMMIR

85 QANIAGKPVVTATQMLSEMITNPRPTRAECSDVANAVLDGTDCVMLSGETANGEYPTAAVTIMSETCCEAEGAQN  
86 TNMLYQAVRNSTLSQYGILSTSESIASSAAKTAIDVGAKAIIVCSESGMTATQVAKFRPGRPIHVLTHDVRVARQ  
87 CSGYLRGASVEVISSMDQMDPAIDAYIERCKANGKAVAGDAFVVVVTGTVAQRGVTNA

88

89 >PK\_56445 cytosol (538 Amino acids) (JGI 56445) cytosol

90 MSLSQSSDVPILAGGFITLDTVKHPTNTINRRTKIVCTIGPACWNVDQLEILIESGMNVARFNFSHGDHAGHGAV  
91 LERVRQAAQNKGRNIAILLDTKGPEIRTGFFANGASKIELVKGETIVLTSYKFKGDQHKLACSYPALAQSQTGG  
92 QQIILVADGSLVLTVLQTDEAAGEVSCRIDNNASMGGERKNMNLPGVKVDLPTFTEKDVDDIVNFGIKHKVDFIAAS  
93 FVRKQSDVANLRQLLAENGGQIQIKICKIENQEGLENYDEILQATDSIMVARGDLGMEIPPAKVFLAQKMMIREA  
94 NIAGKPVITATQMLSEMINNPRPTRAECSDVANAVLDGTDCVMLSGETANGPYFEEAVKVMARTCCEAENSRNYN  
95 SLYSAVRSSVMKYGSPPEESLASSAVKTAIDVNARLILVLSSESGMTAGYVSKFRPERAIVCLTPSDAVARQTG  
96 GILKGVHSYVVDNLDNTEELIAETGVEAVKAGIASVGDLMVVVSGTLYGIGKNNQVRVSVIEAPEGTVKETPAAM  
97 KRLVSFVYAADEI

98

99 >PK\_45997 cytosol (533 Amino acids) (JGI 45997) cytosol

100 MLSSTSTIPKLDGEVVTLIIKKPTETKKRRTKIICTLGPAWSEEGQLMDAGMNVARFNFSHGDHEGHGKVL  
101 ERLRKVAKEKRNIAVLLDTKGPEIRTGFFADGIDKINLSKGDITVLTDDYDFKGD SKRLACSYPTLAKSVTQQQ  
102 AILIADGSLVLTVLSIDTANNEVQCRVENNASIGERKNMNLPGVVVDLPTFTERDVNDIVNFGIKSKVDFIAASF  
103 VRKGSVDTNLRKLLADNGGPQIKIICKIENQEGLENYGDI LEHTDAIMVARGDLGMEIPSSKVFLAQKYMIREAN  
104 VAGKPVVTATQMLSEMVNPRPTRAECSDVANAVYDGTDAVMLSGETANGPHFEKAVLVMARTCCEAESSRNYNL  
105 LFQSVRNSIVIARGGLSTGESMASSAVKSALDIEAKLIVVMSETGKMGNYVAKFRPGLSVLCMTPNETAARQASG  
106 LLLGMHTVVVDSLEKSEELVEELNYELVQSNFLKPGDKMVVIAGRMAGMKEQLRIVTLDEGKSYGHIVSGTSFFF  
107 ERTRLLDF

108

109 >PK\_56172 mitochondria (86 Amino acids) (JGI: 56172) mitochondria

110 MFRAVLSLSTRAIRTPVPCSVARGDASQVRSLAQTTFYLPDPADRSQDVHNRGNLQLSKIVATIGPTSEQEEPL  
111 RLVTDAGMRIM

112
